# Supplementary material for: A systematic assessment of preclinical multilaboratory studies and a comparison to single laboratory studies
Source: eLife journal article supplement (doi:10.7554/elife.76300), 2023-03-09

**Figure 2 – figure supplement 1.** Standardized mean differences for all 14 single vs multilaboratory comparisons and sub-groups by total quality score

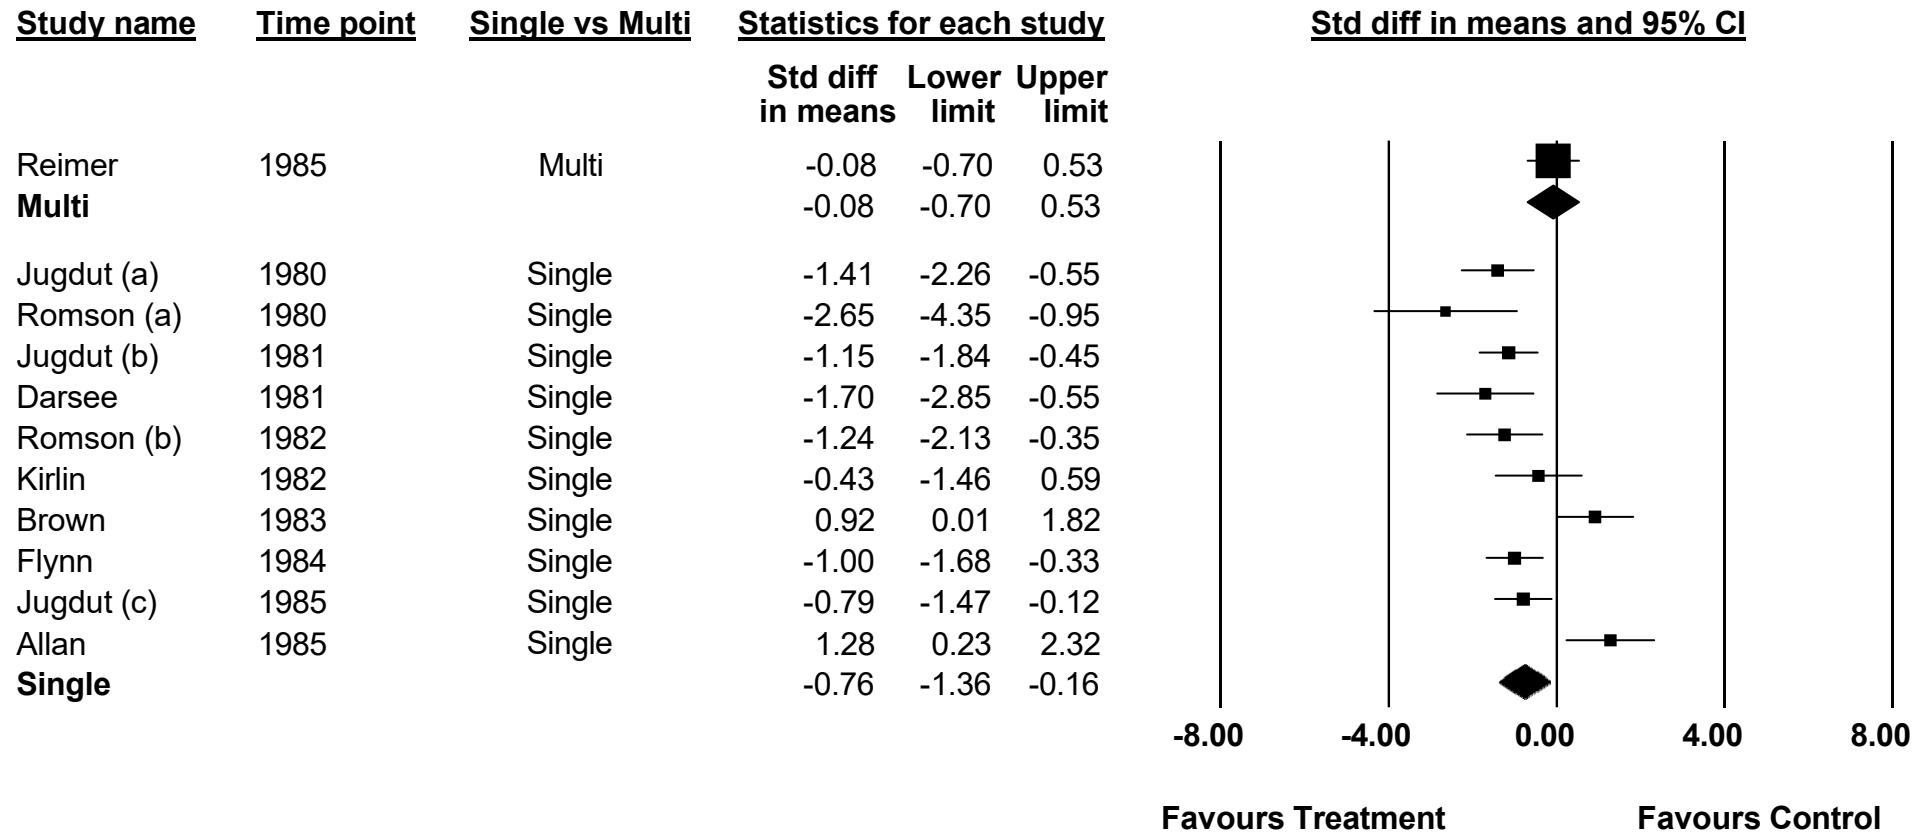

| <u>Study name</u>     | <u>Time point</u> | <u>Single vs Multi</u> | <u>Quality Score</u> | <u>Statistics for each study</u> |                    |                    |
|-----------------------|-------------------|------------------------|----------------------|----------------------------------|--------------------|--------------------|
|                       |                   |                        |                      | <u>Std diff in means</u>         | <u>Lower limit</u> | <u>Upper limit</u> |
| Reimer                | 1985              | Multi                  | <3                   | -0.08                            | -0.70              | 0.53               |
| <b>Multi OVERALL</b>  |                   |                        |                      | -0.08                            | -0.70              | 0.53               |
| Jugdut (a)            | 1980              | Single                 | <3                   | -1.41                            | -2.26              | -0.55              |
| Romson (a)            | 1980              | Single                 | <3                   | -2.65                            | -4.35              | -0.95              |
| Jugdut (b)            | 1981              | Single                 | <3                   | -1.15                            | -1.84              | -0.45              |
| Darsee                | 1981              | Single                 | <3                   | -1.70                            | -2.85              | -0.55              |
| Romson (b)            | 1982              | Single                 | <3                   | -1.24                            | -2.13              | -0.35              |
| Kirlin                | 1982              | Single                 | <3                   | -0.43                            | -1.46              | 0.59               |
| Brown                 | 1983              | Single                 | <3                   | 0.92                             | 0.01               | 1.82               |
| Flynn                 | 1984              | Single                 | <3                   | -1.00                            | -1.68              | -0.33              |
| Jugdut (c)            | 1985              | Single                 | <3                   | -0.79                            | -1.47              | -0.12              |
| Allan                 | 1985              | Single                 | <3                   | 1.28                             | 0.23               | 2.32               |
| <b>Single OVERALL</b> |                   |                        |                      | -0.76                            | -1.36              | -0.16              |

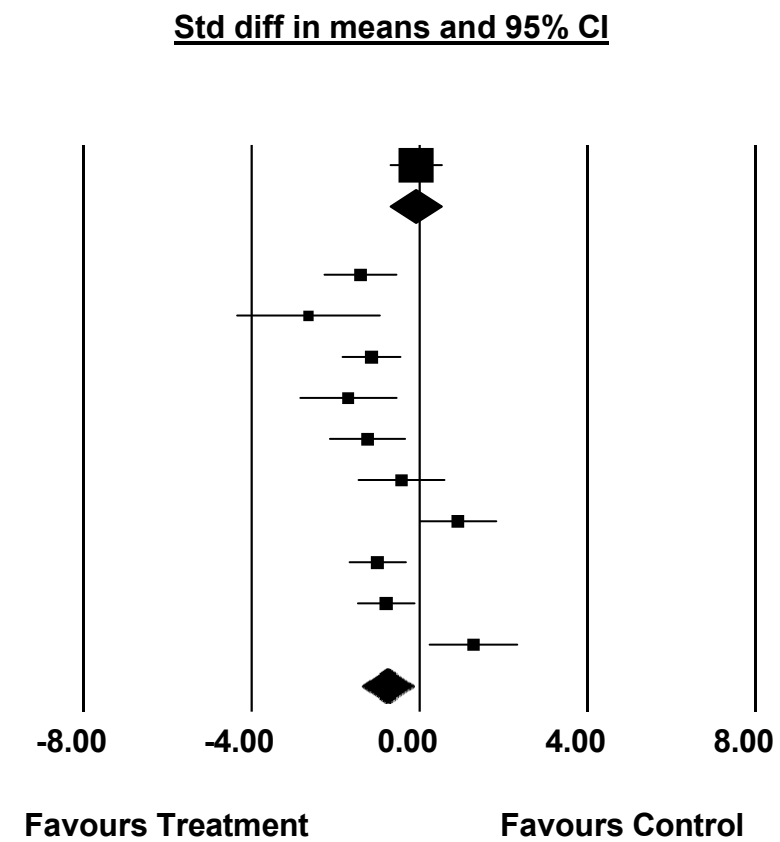

| <u>Study name</u> | <u>Time point</u> | <u>Single vs Multi</u> | <u>Statistics for each study</u> |                |                |
|-------------------|-------------------|------------------------|----------------------------------|----------------|----------------|
|                   |                   |                        | Std diff<br>in means             | Lower<br>limit | Upper<br>limit |
| Alam              | 2009              | Multi                  | 2.19                             | 1.25           | 3.12           |
| <b>Multi</b>      |                   |                        | <b>2.19</b>                      | <b>1.25</b>    | <b>3.12</b>    |
| Alam              | 2011              | Single                 | 6.75                             | 4.13           | 9.37           |
| Lee               | 2013              | Single                 | 0.58                             | -0.32          | 1.47           |
| Schechtman        | 2019              | Single                 | 0.53                             | -0.10          | 1.16           |
| Sheppard          | 2018              | Single                 | 1.00                             | -0.20          | 2.20           |
| Sheppard          | 2019              | Single                 | 0.69                             | -0.14          | 1.51           |
| <b>Single</b>     |                   |                        | <b>1.28</b>                      | <b>0.25</b>    | <b>2.31</b>    |

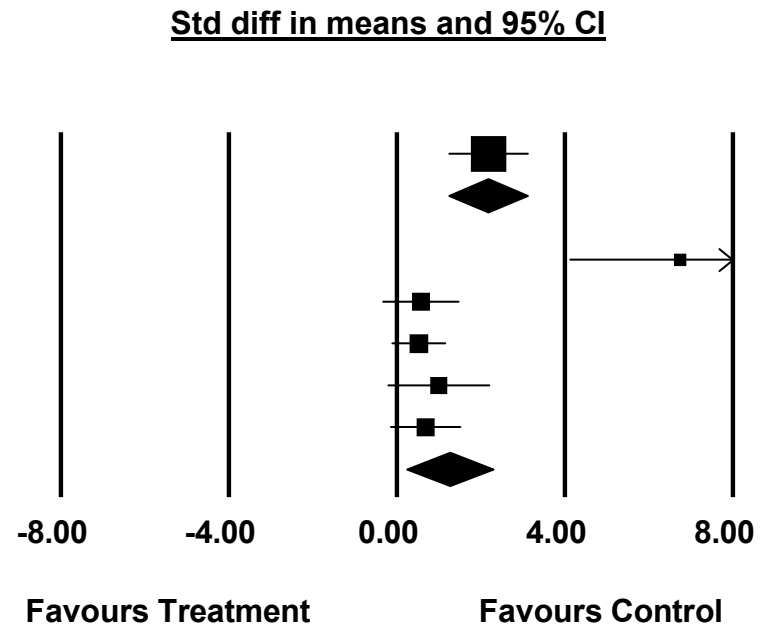

| <u>Study name</u>     | <u>Time point</u> | <u>Single vs Multi</u> | <u>Time point</u> | <u>Statistics for each study</u> |                    |                    |
|-----------------------|-------------------|------------------------|-------------------|----------------------------------|--------------------|--------------------|
|                       |                   |                        |                   | <b>Std diff in means</b>         | <b>Lower limit</b> | <b>Upper limit</b> |
| Alam                  | 2009              | Multi                  | <3                | 2.19                             | 1.25               | 3.12               |
| <b>Multi OVERALL</b>  |                   |                        |                   | <b>2.19</b>                      | <b>1.25</b>        | <b>3.12</b>        |
| Alam                  | 2011              | Single                 | <3                | 6.75                             | 4.13               | 9.37               |
| Lee                   | 2013              | Single                 | <3                | 0.58                             | -0.32              | 1.47               |
| Schechtman            | 2019              | Single                 | <3                | 0.53                             | -0.10              | 1.16               |
| Sheppard              | 2018              | Single                 | <3                | 1.00                             | -0.20              | 2.20               |
| Sheppard              | 2019              | Single                 | <3                | 0.69                             | -0.14              | 1.51               |
| <b>Single OVERALL</b> |                   |                        |                   | <b>1.28</b>                      | <b>0.25</b>        | <b>2.31</b>        |

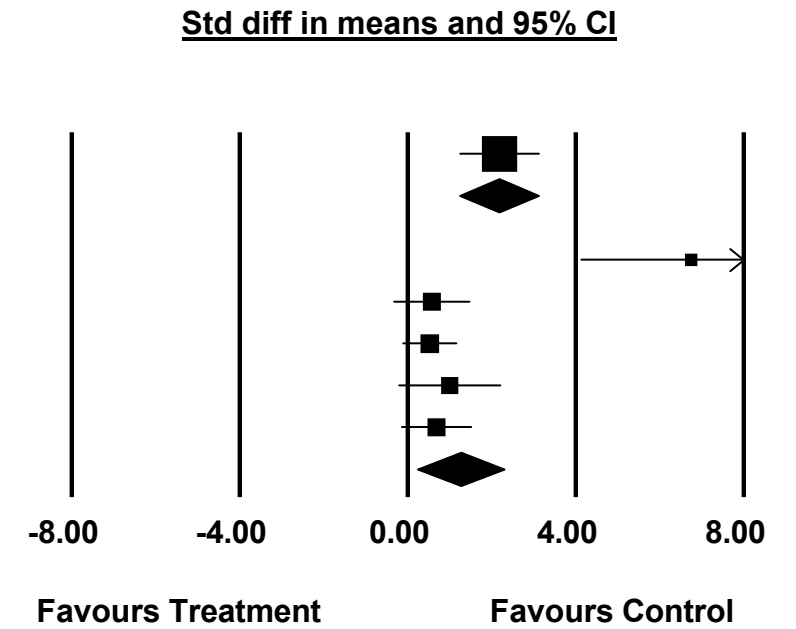

| <u>Study name</u> | <u>Time point</u> | <u>Single vs Multi</u> | <u>Statistics for each study</u> |                        |                        |
|-------------------|-------------------|------------------------|----------------------------------|------------------------|------------------------|
|                   |                   |                        | <b>Std diff<br/>in means</b>     | <b>Lower<br/>limit</b> | <b>Upper<br/>limit</b> |
| Spoerke           | 2009              | Multi                  | 0.56                             | -0.44                  | 1.56                   |
| <b>Multi</b>      |                   |                        | <b>0.56</b>                      | <b>-0.44</b>           | <b>1.56</b>            |
| Shuja             | 2008              | Single                 | -0.27                            | -1.41                  | 0.87                   |
| Shuja             | 2011              | Single                 | -0.65                            | -1.93                  | 0.62                   |
| Imam              | 2013              | Single                 | 0.52                             | -0.74                  | 1.78                   |
| Halaweish         | 2016              | Single                 | -1.31                            | -2.67                  | 0.06                   |
| Georgoff          | 2017              | Single                 | -0.08                            | -1.32                  | 1.16                   |
| <b>Single</b>     |                   |                        | <b>-0.32</b>                     | <b>-0.89</b>           | <b>0.24</b>            |

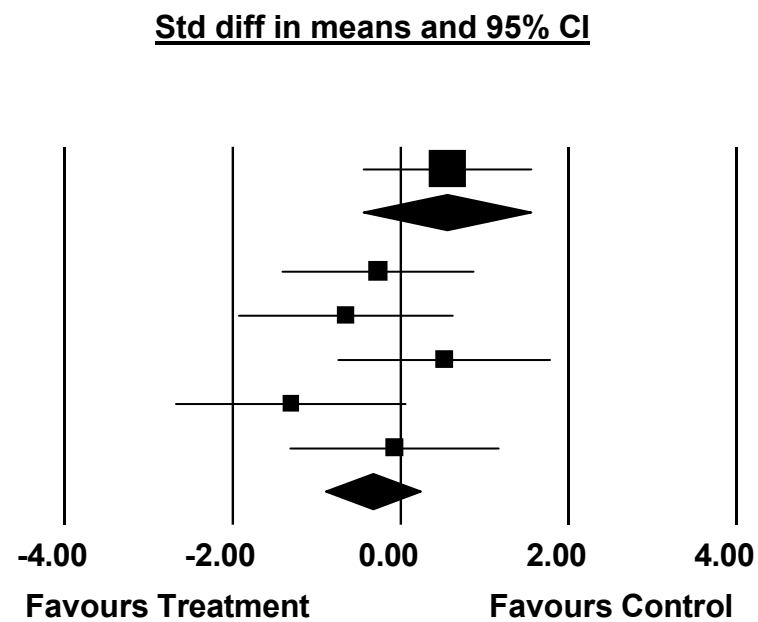

| <u>Study name</u>     | <u>Time point</u> | <u>Single vs Multi</u> | <u>Quality Score</u> | <u>Statistics for each study</u> |                        |                        |
|-----------------------|-------------------|------------------------|----------------------|----------------------------------|------------------------|------------------------|
|                       |                   |                        |                      | <b>Std diff<br/>in means</b>     | <b>Lower<br/>limit</b> | <b>Upper<br/>limit</b> |
| Spoerke               | 2009              | Multi                  | <3                   | 0.56                             | -0.44                  | 1.56                   |
| <b>Multi OVERALL</b>  |                   |                        |                      | <b>0.56</b>                      | <b>-0.44</b>           | <b>1.56</b>            |
| Shuja                 | 2008              | Single                 | <3                   | -0.27                            | -1.41                  | 0.87                   |
| Shuja                 | 2011              | Single                 | <3                   | -0.65                            | -1.93                  | 0.62                   |
| Imam                  | 2013              | Single                 | <3                   | 0.52                             | -0.74                  | 1.78                   |
| Halaweish             | 2016              | Single                 | <3                   | -1.31                            | -2.67                  | 0.06                   |
| Georgoff              | 2017              | Single                 | <3                   | -0.08                            | -1.32                  | 1.16                   |
| <b>Single OVERALL</b> |                   |                        |                      | <b>-0.32</b>                     | <b>-0.89</b>           | <b>0.24</b>            |

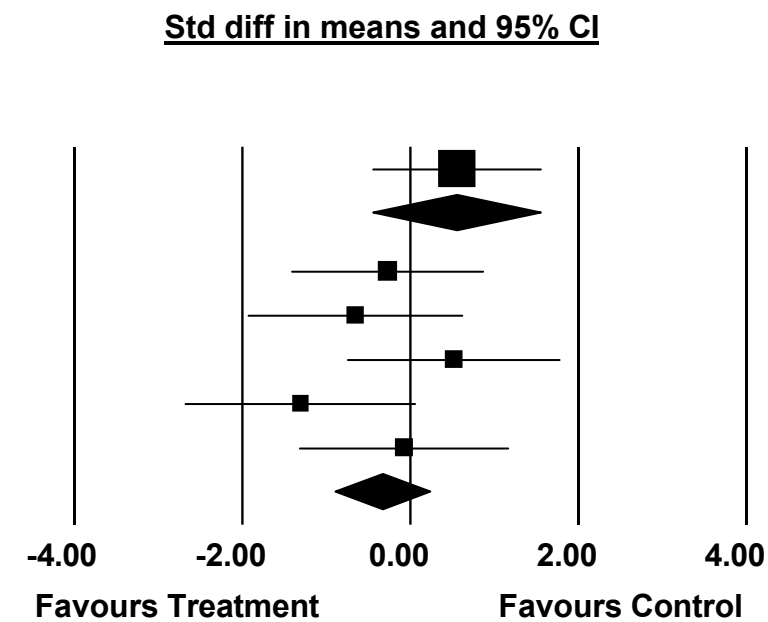

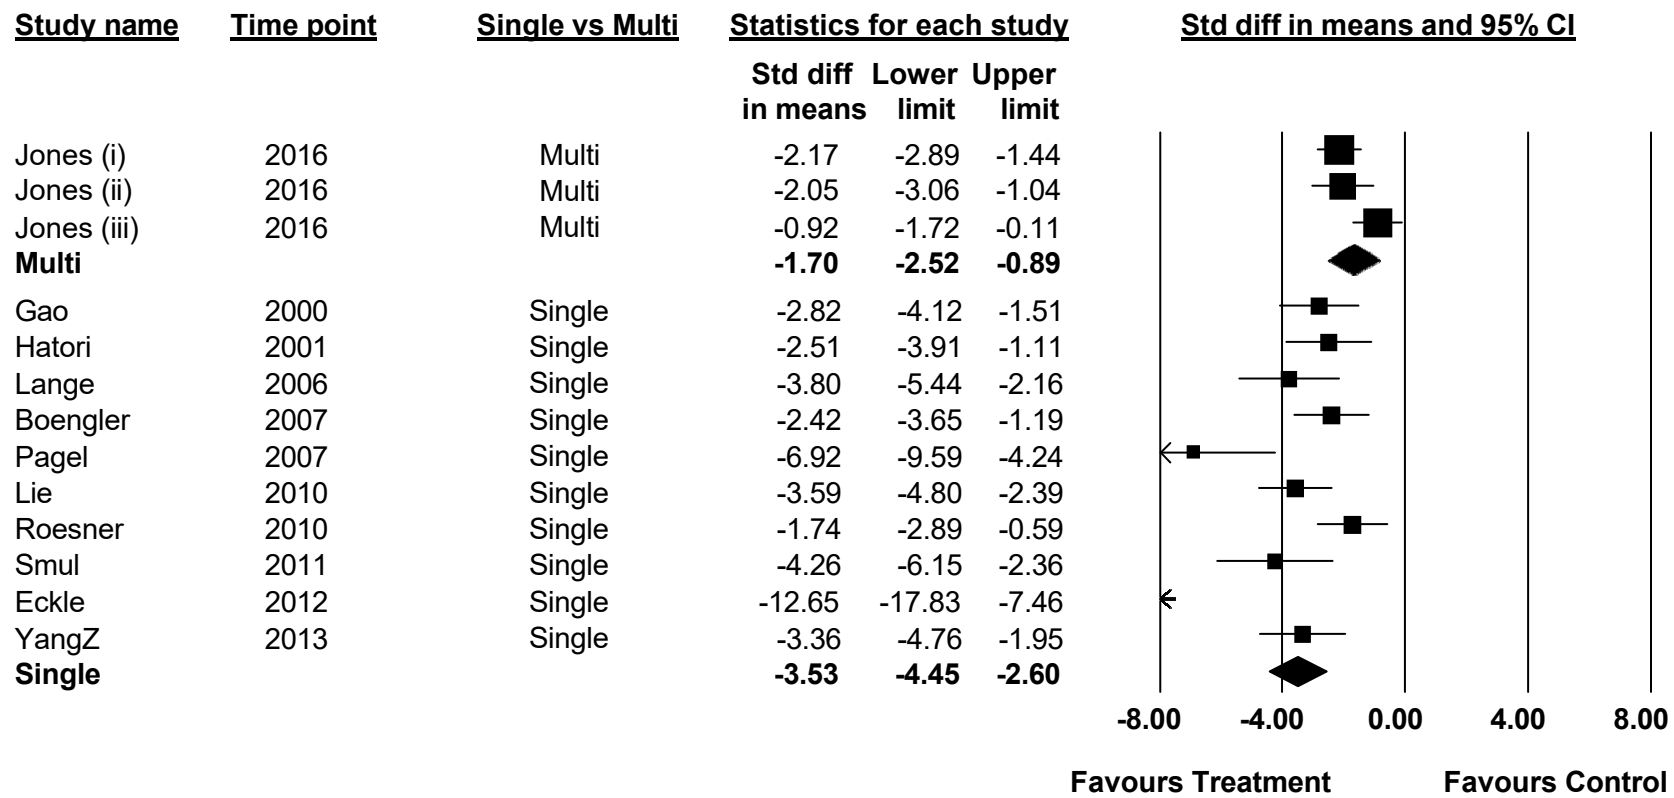

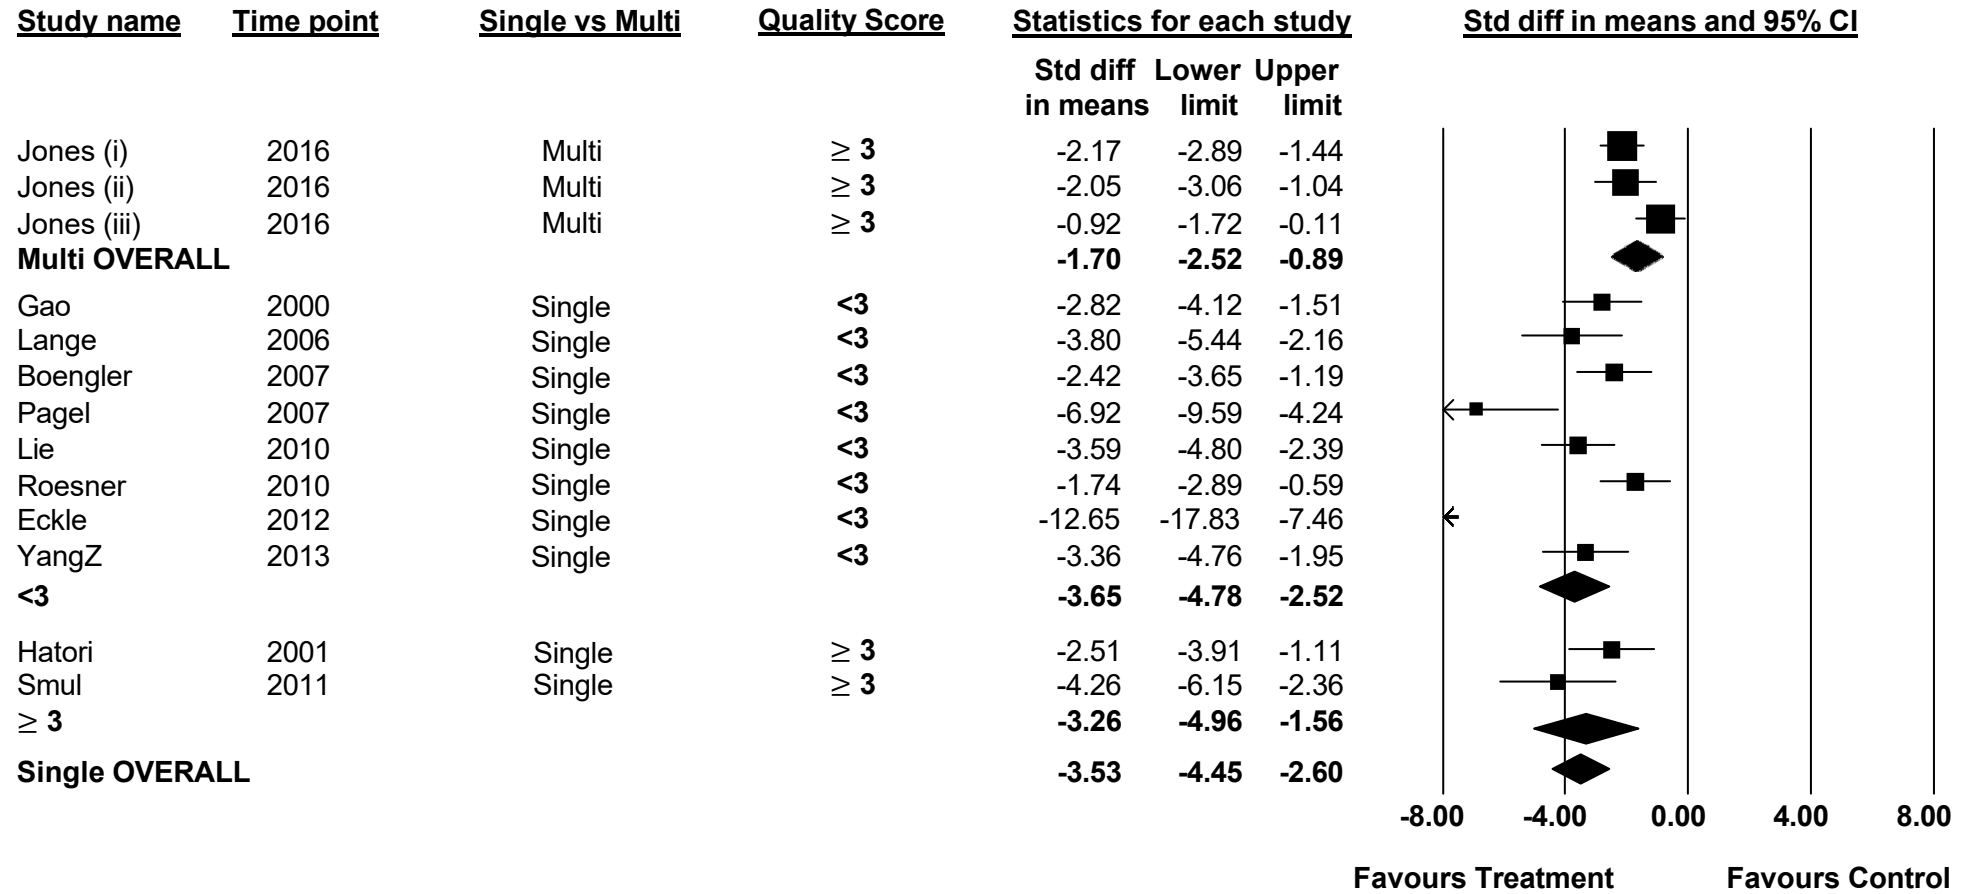



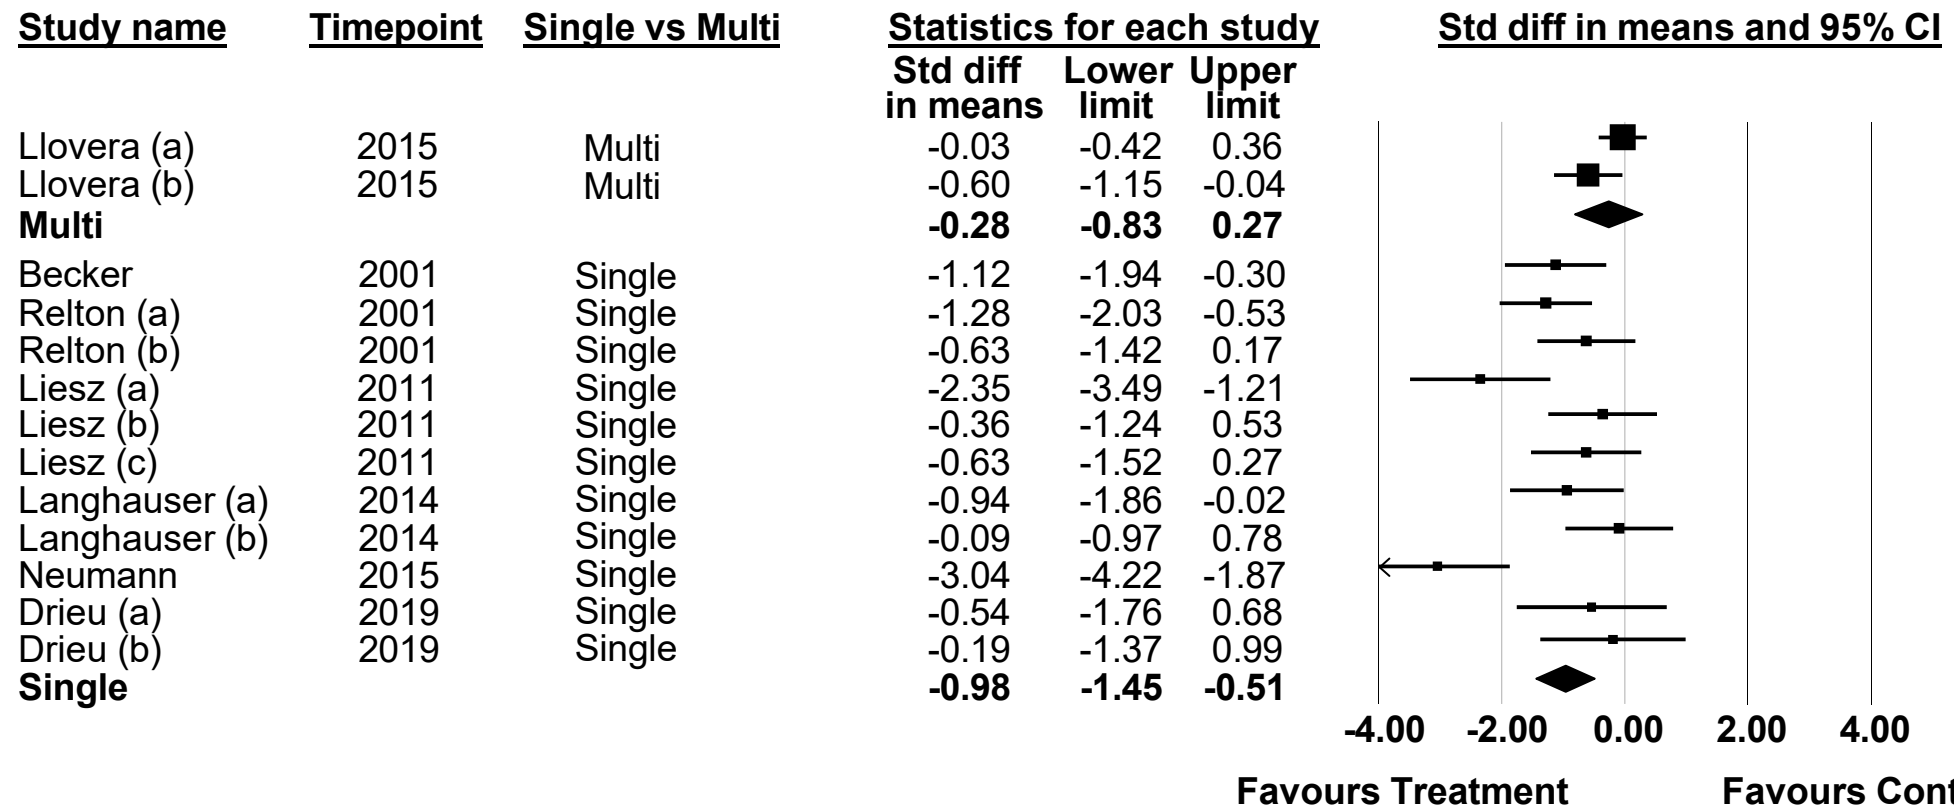

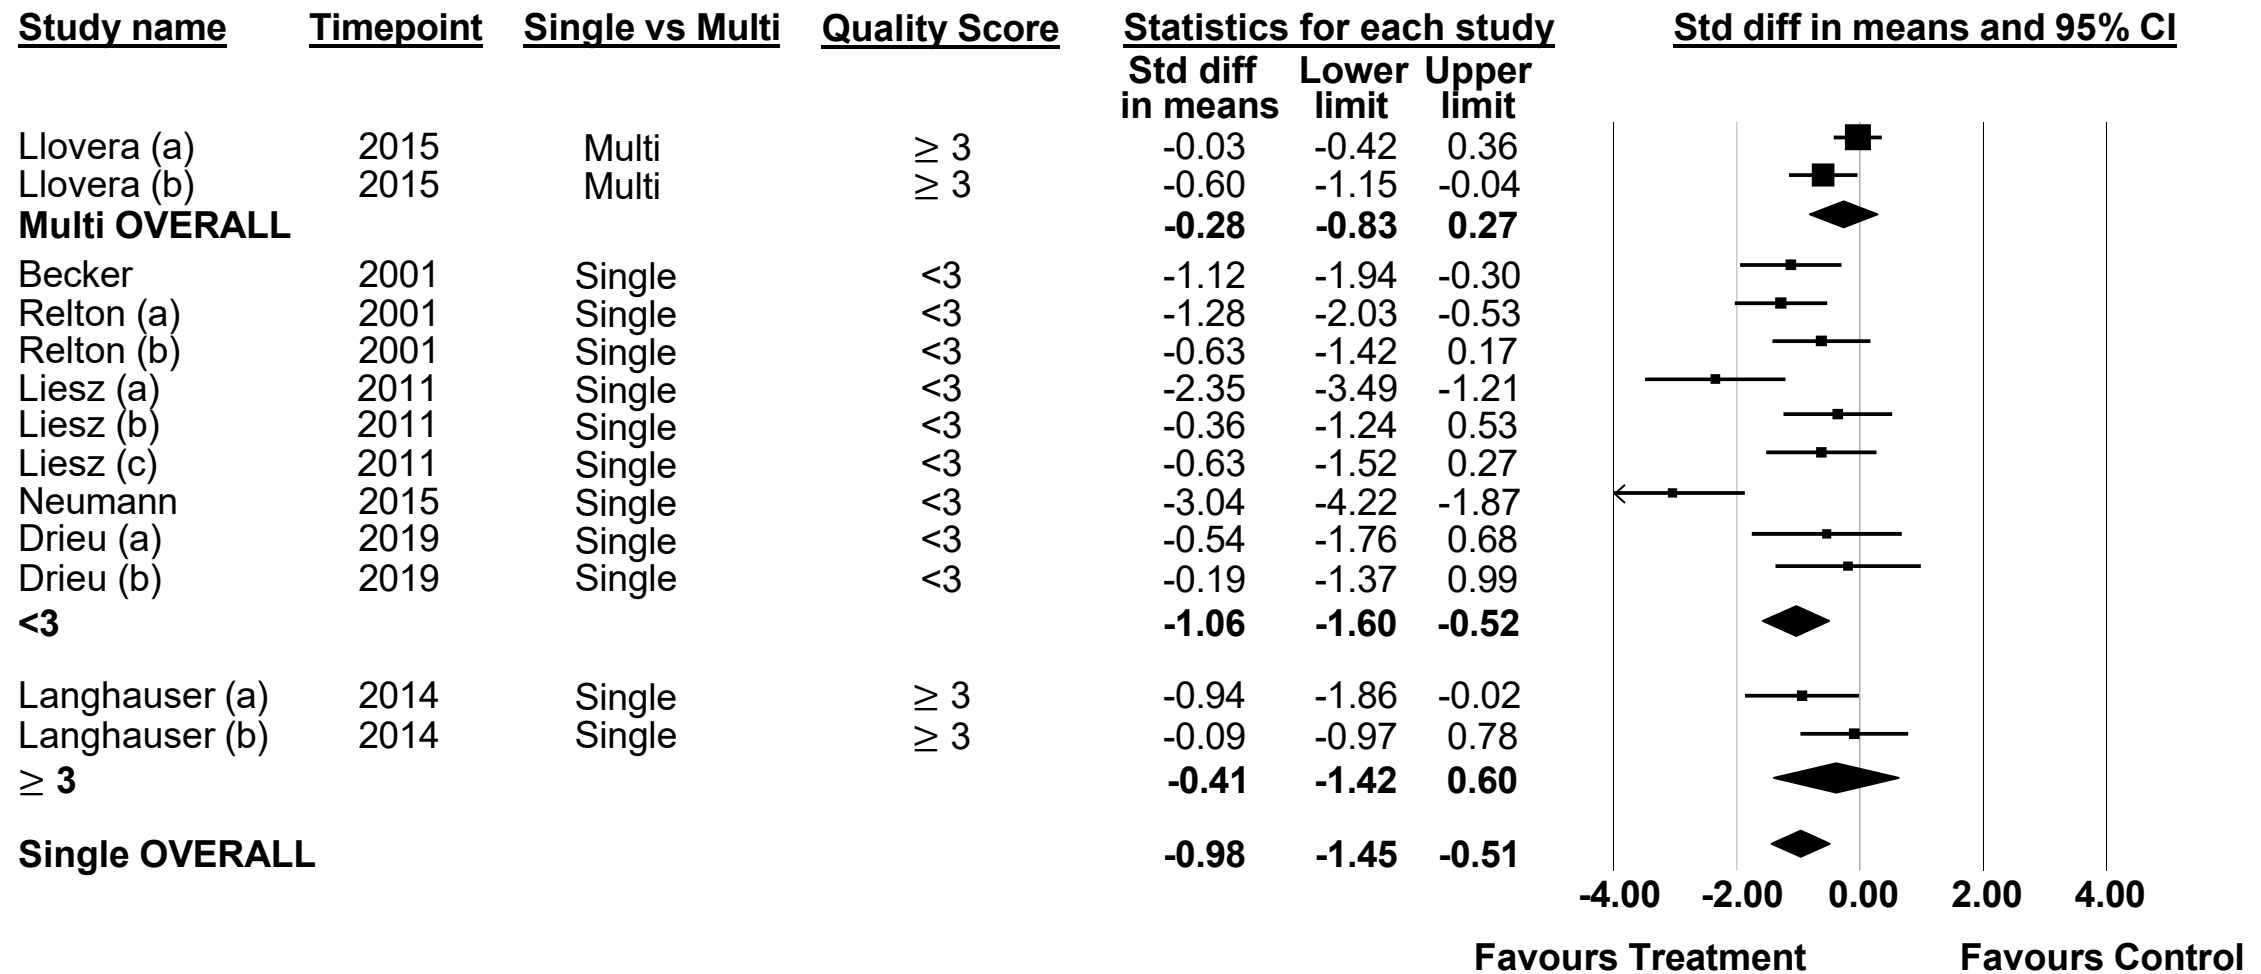

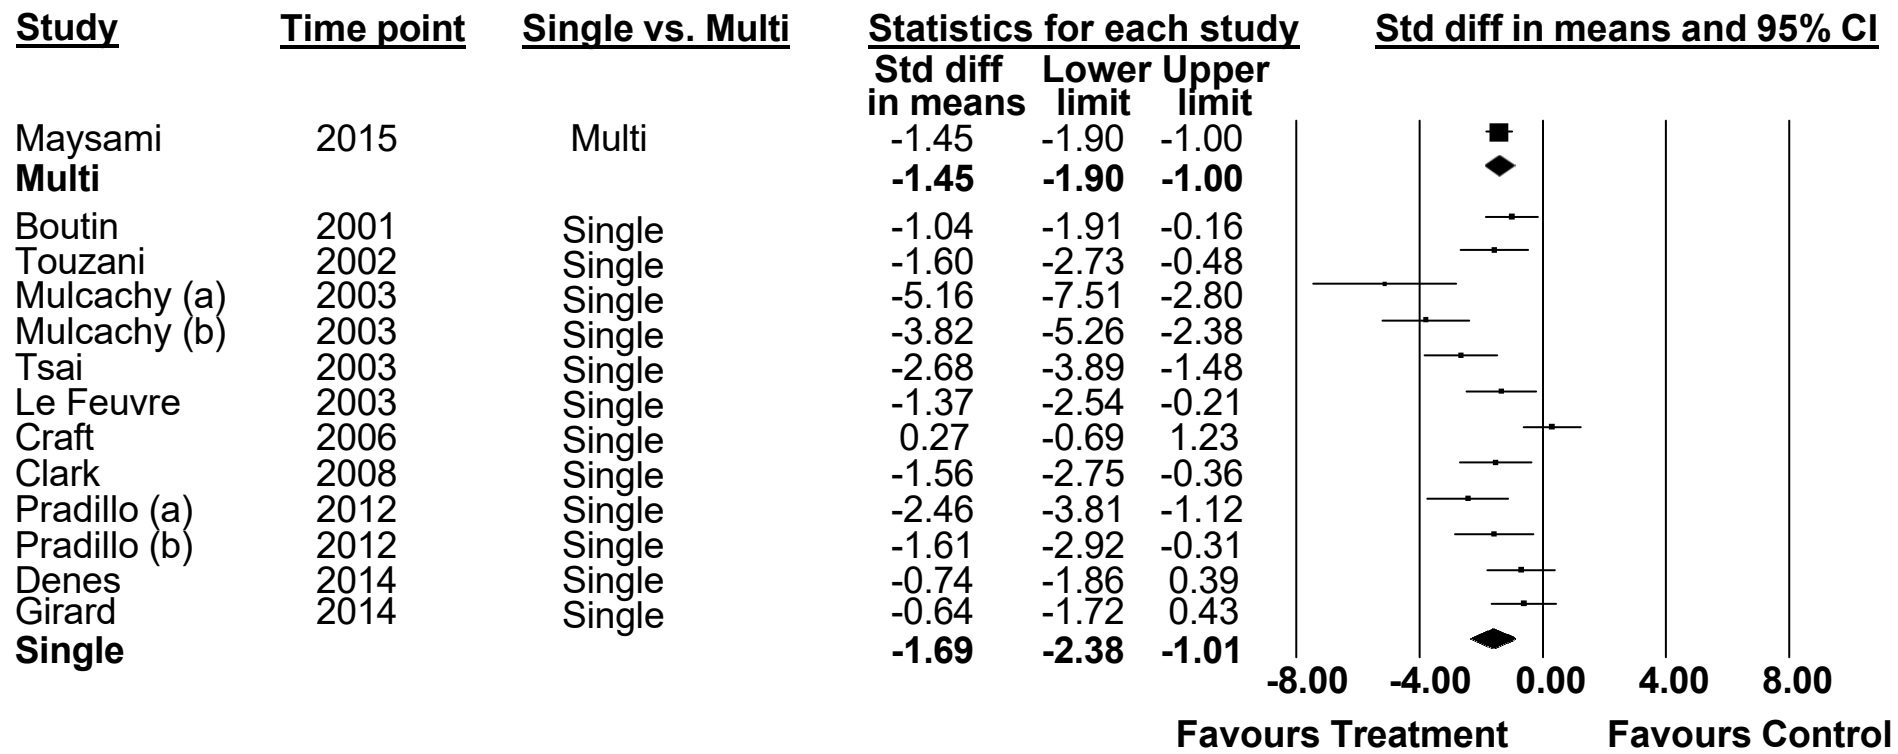

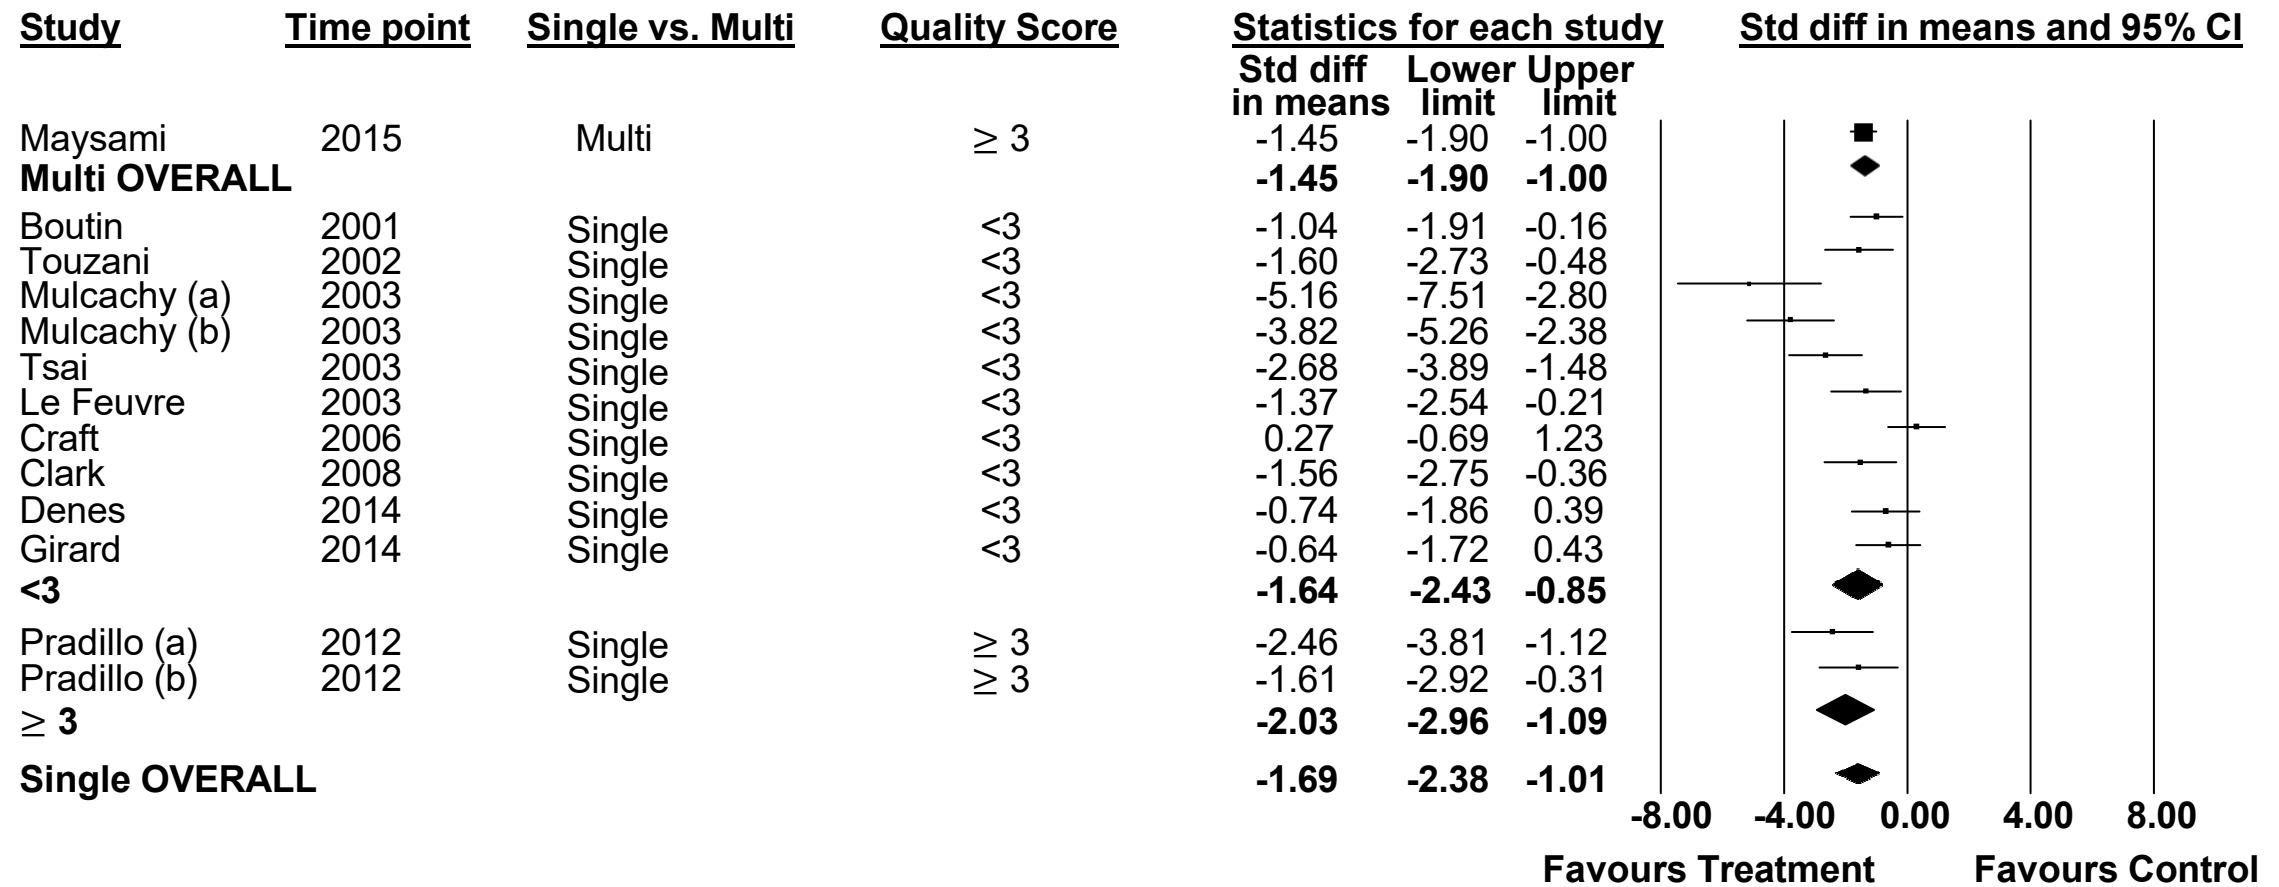

| <u>Study name</u>       | <u>Time point</u> | <u>Single vs Multi</u> | <u>Statistics for each study</u> |                        |                        |
|-------------------------|-------------------|------------------------|----------------------------------|------------------------|------------------------|
|                         |                   |                        | <b>Std diff<br/>in means</b>     | <b>Lower<br/>limit</b> | <b>Upper<br/>limit</b> |
| Bramlett (i)            | 2016              | Multi                  | -0.44                            | -1.33                  | 0.45                   |
| Bramlett (ii)           | 2016              | Multi                  | 0.18                             | -0.62                  | 0.98                   |
| Bramlett (iii)          | 2016              | Multi                  | 0.89                             | 0.13                   | 1.65                   |
| <b>Multi</b>            |                   |                        | 0.24                             | -0.51                  | 0.98                   |
| <b>Single (Peng SR)</b> |                   |                        | -1.72                            | -2.36                  | -1.07                  |

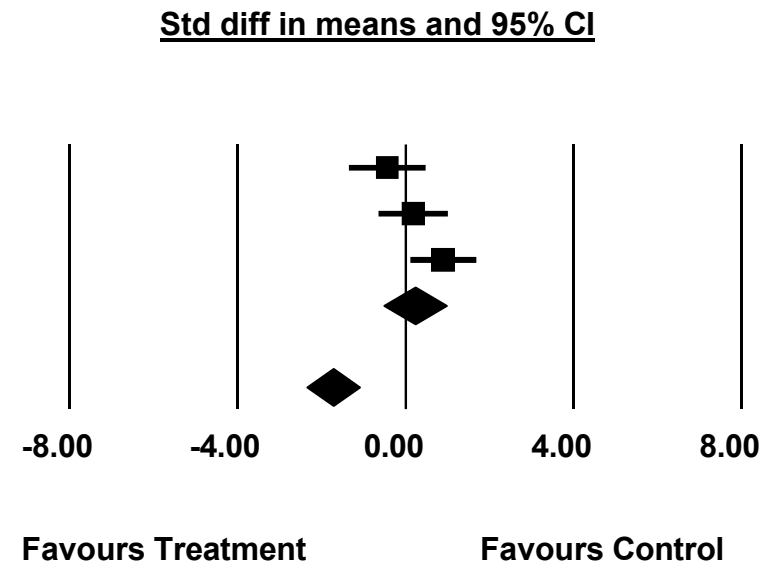

| <u>Study name</u>               | <u>Time point</u> | <u>Single vs Multi</u> | <u>Quality Score</u> | <u>Statistics for each study</u> |                        |                        |
|---------------------------------|-------------------|------------------------|----------------------|----------------------------------|------------------------|------------------------|
|                                 |                   |                        |                      | <u>Std diff<br/>in means</u>     | <u>Lower<br/>limit</u> | <u>Upper<br/>limit</u> |
| Bramlett (i)                    | 2016              | Multi                  | $\geq 3$             | -0.44                            | -1.33                  | 0.45                   |
| Bramlett (ii)                   | 2016              | Multi                  | $\geq 3$             | 0.18                             | -0.62                  | 0.98                   |
| Bramlett (iii)                  | 2016              | Multi                  | $\geq 3$             | 0.89                             | 0.13                   | 1.65                   |
| <b>Multi OVERALL</b>            |                   |                        |                      | 0.24                             | -0.51                  | 0.98                   |
| <b>Single (Peng SR) OVERALL</b> |                   |                        | $< 3$                | -1.72                            | -2.36                  | -1.07                  |

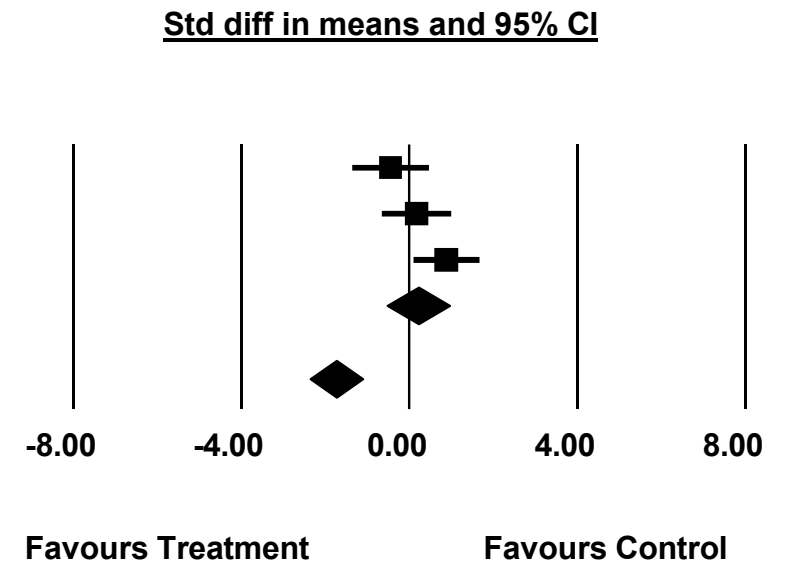

| <u>Study name</u> | <u>Time point</u> | <u>Single vs Multi</u> | <u>Statistics for each study</u> |                |                |
|-------------------|-------------------|------------------------|----------------------------------|----------------|----------------|
|                   |                   |                        | Std diff<br>in means             | Lower<br>limit | Upper<br>limit |
| Browning (FPI)    | 2016              | Multi                  | 0.52                             | -0.31          | 1.35           |
| Browning (CCI)    | 2016              | Multi                  | -0.60                            | -1.50          | 0.30           |
| Browning (PBBI)   | 2016              | Multi                  | -0.46                            | -1.29          | 0.37           |
| <b>Multi</b>      |                   |                        | <b>-0.17</b>                     | <b>-0.86</b>   | <b>0.52</b>    |
| Zou (i)           | 2013              | Single                 | 0.07                             | -0.73          | 0.87           |
| Zou (ii)          | 2015              | Single                 | -1.14                            | -2.00          | -0.27          |
| Caudle            | 2016              | Single                 | -0.61                            | -1.45          | 0.22           |
| Jin               | 2016              | Single                 | -0.99                            | -2.02          | 0.05           |
| <b>Single</b>     |                   |                        | <b>-0.63</b>                     | <b>-1.18</b>   | <b>-0.08</b>   |

Std diff in means and 95% CI

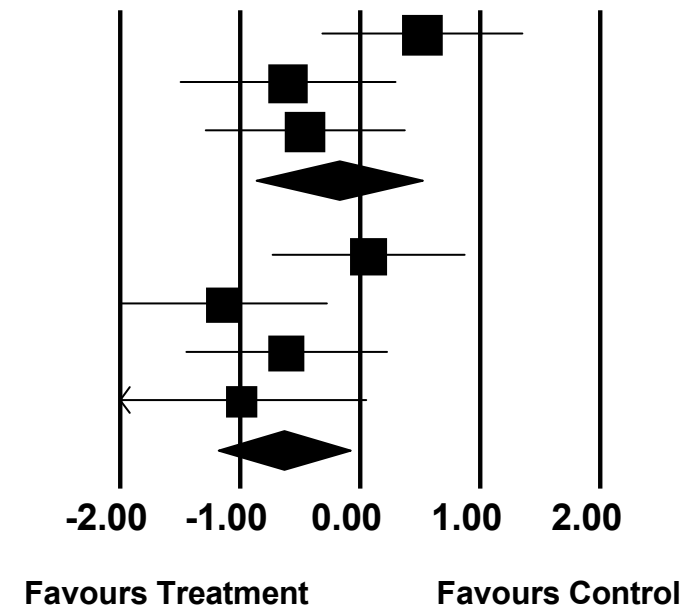

| <u>Study name</u>          | <u>Time point</u> | <u>Single vs Multi</u> | <u>Quality Score</u> | <u>Statistics for each study</u> |                |                |
|----------------------------|-------------------|------------------------|----------------------|----------------------------------|----------------|----------------|
|                            |                   |                        |                      | Std diff<br>in means             | Lower<br>limit | Upper<br>limit |
| Browning (FPI)             | 2016              | Multi                  | $\geq 3$             | 0.52                             | -0.31          | 1.35           |
| Browning (CCI)             | 2016              | Multi                  | $\geq 3$             | -0.60                            | -1.50          | 0.30           |
| Browning (PBBi)            | 2016              | Multi                  |                      | -0.46                            | -1.29          | 0.37           |
| <b>Multi OVERALL</b>       |                   |                        |                      | <b>-0.17</b>                     | <b>-0.86</b>   | <b>0.52</b>    |
| Caudle                     | 2016              | Single                 | $<3$                 | -0.61                            | -1.45          | 0.22           |
| Jin                        | 2016              | Single                 | $<3$                 | -0.99                            | -2.02          | 0.05           |
| <b><math>&lt;3</math></b>  |                   |                        |                      | <b>-0.76</b>                     | <b>-1.41</b>   | <b>-0.11</b>   |
| Zou (i)                    | 2013              | Single                 | $\geq 3$             | 0.07                             | -0.73          | 0.87           |
| Zou (ii)                   | 2015              | Single                 | $\geq 3$             | -1.14                            | -2.00          | -0.27          |
| <b><math>\geq 3</math></b> |                   |                        |                      | <b>-0.52</b>                     | <b>-1.71</b>   | <b>0.66</b>    |
| <b>Single OVERALL</b>      |                   |                        |                      | <b>-0.63</b>                     | <b>-1.18</b>   | <b>-0.08</b>   |

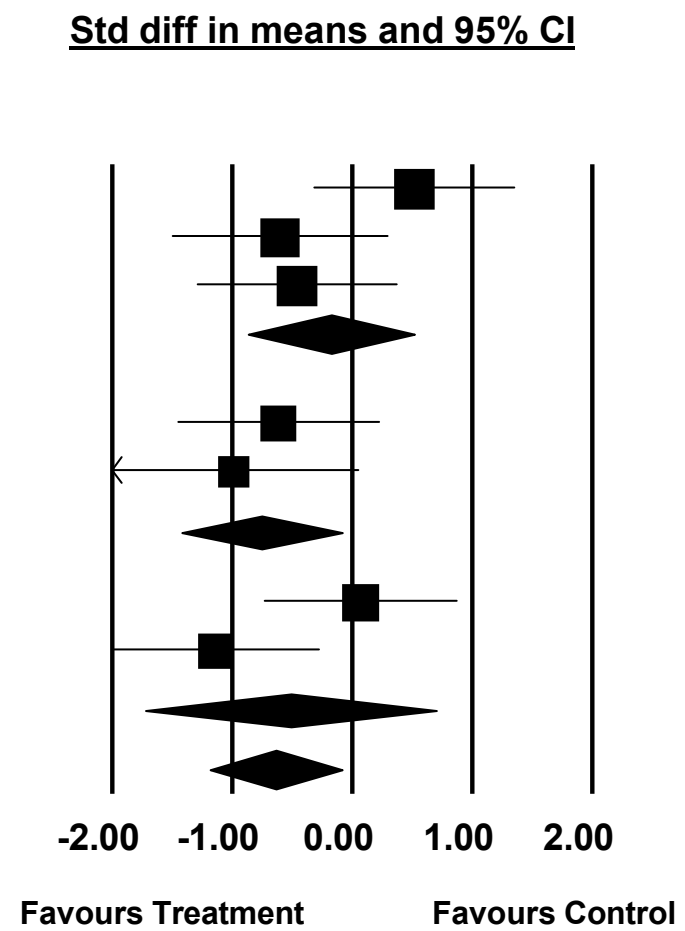



| <u>Study name</u> | <u>Time point</u> | <u>Single vs Multi</u> | <u>Statistics for each study</u> |                |                | <u>Std diff in means and 95% CI</u> |
|-------------------|-------------------|------------------------|----------------------------------|----------------|----------------|-------------------------------------|
|                   |                   |                        | Std diff<br>in means             | Lower<br>limit | Upper<br>limit |                                     |
| Dixon (FPI)       | 2016              | Multi                  | 0.60                             | -0.28          | 1.47           |                                     |
| Dixon (CCI)       | 2016              | Multi                  | 0.24                             | -0.65          | 1.12           |                                     |
| Dixon (PBBI)      | 2016              | Multi                  | -0.99                            | -1.75          | -0.22          |                                     |
| <b>Multi</b>      |                   |                        | <b>-0.07</b>                     | <b>-1.05</b>   | <b>0.91</b>    |                                     |
| Scheff            | 1999              | Single                 | -2.90                            | -4.20          | -1.60          |                                     |
| Sullivan (i)      | 2000              | Single                 | -3.59                            | -5.59          | -1.59          |                                     |
| Fukui             | 2003              | Single                 | -0.50                            | -1.75          | 0.76           |                                     |
| Gabbita           | 2005              | Single                 | 1.53                             | 0.24           | 2.81           |                                     |
| Mbye              | 2009              | Single                 | -2.02                            | -3.23          | -0.82          |                                     |
| Sullivan (ii)     | 2011              | Single                 | 1.52                             | 0.41           | 2.63           |                                     |
| Vlodavsky         | 2015              | Single                 | -3.12                            | -4.58          | -1.66          |                                     |
| Karlsson          | 2019              | Single                 | -1.04                            | -1.90          | -0.19          |                                     |
| <b>Single</b>     |                   |                        | <b>-1.20</b>                     | <b>-2.50</b>   | <b>0.09</b>    |                                     |

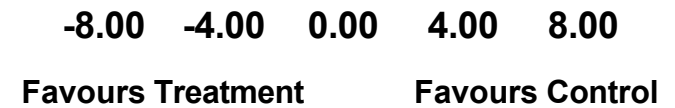

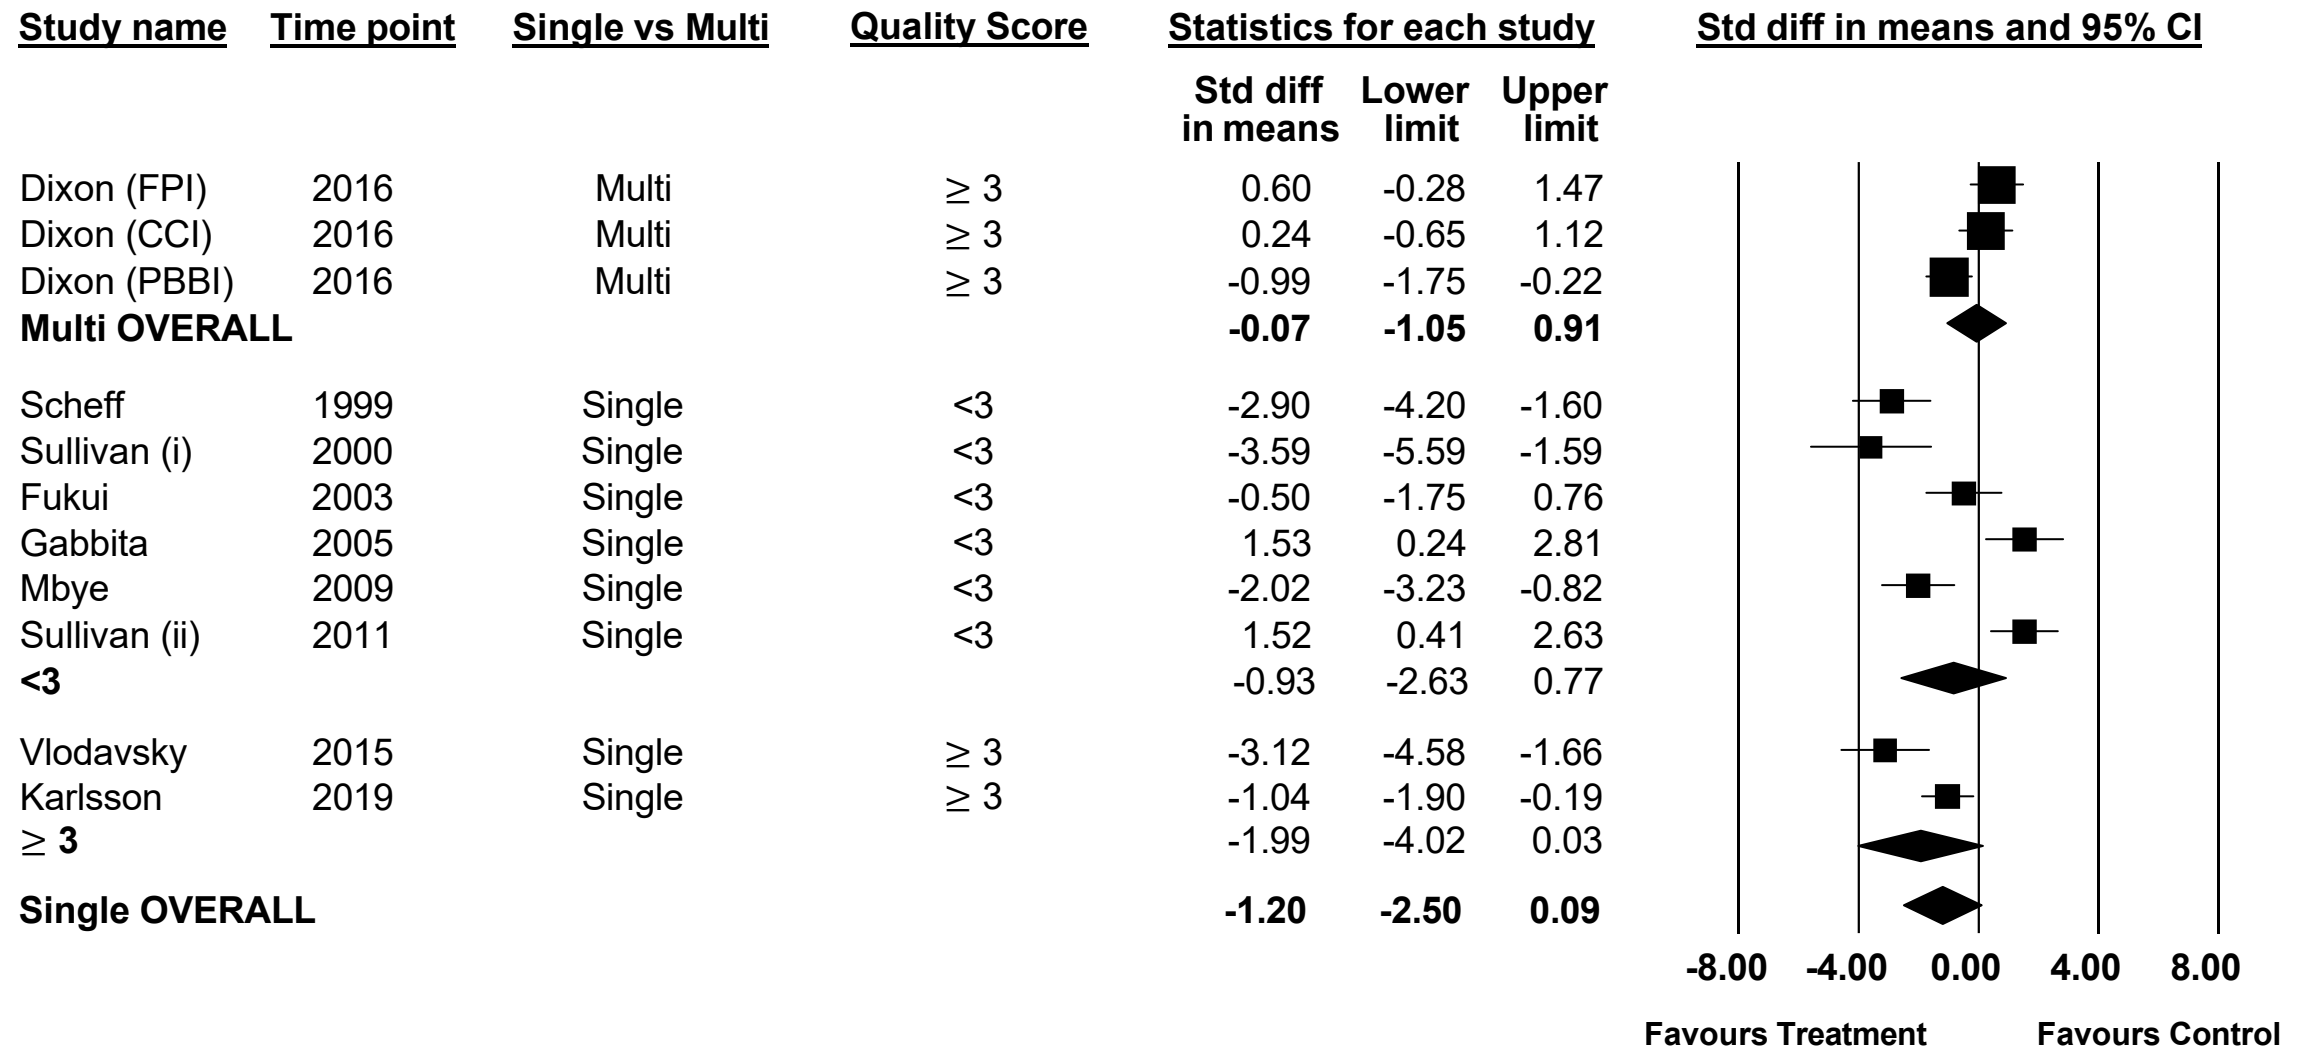

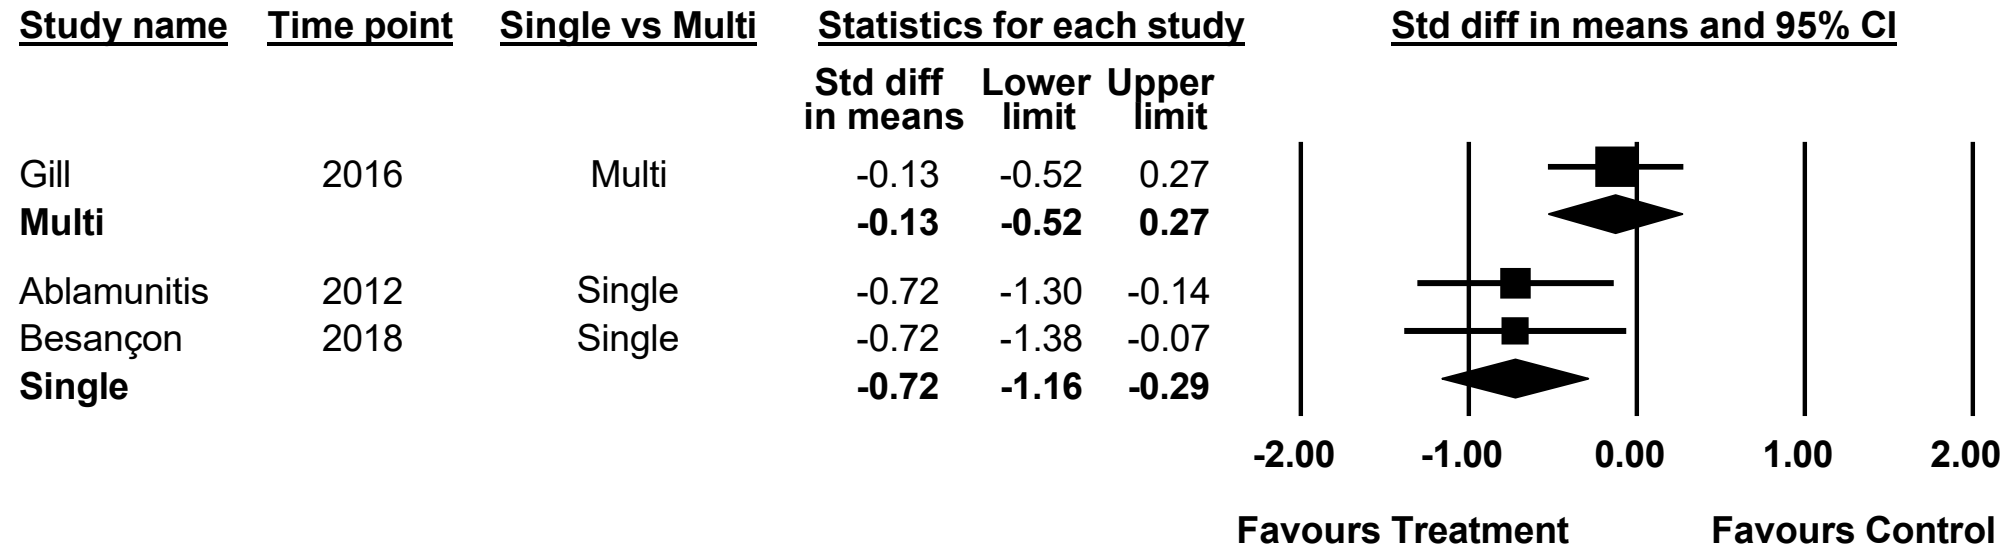

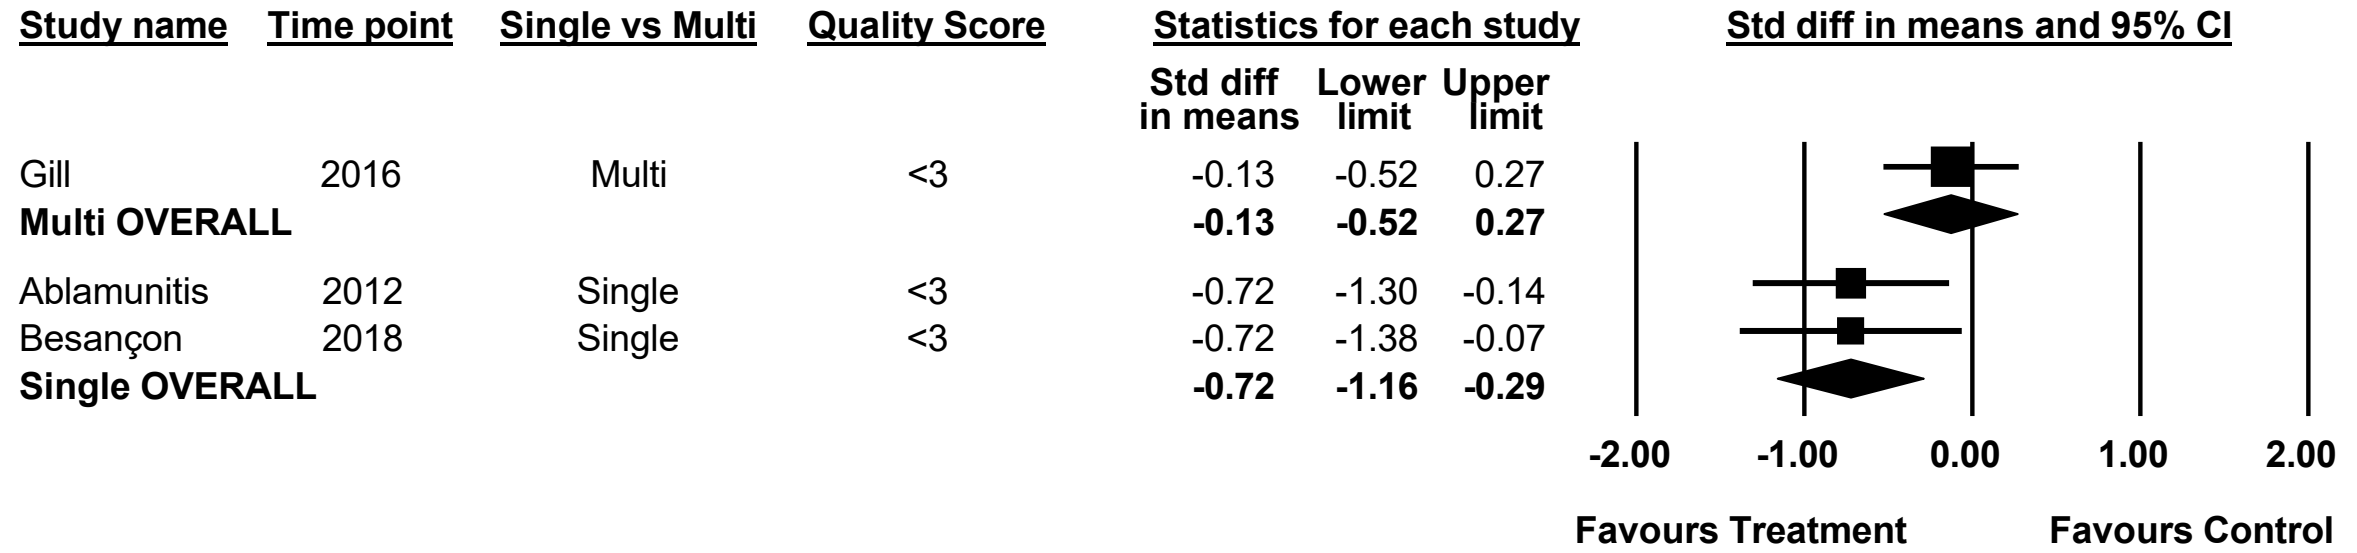

| <u>Study name</u> | <u>Time point</u> | <u>Single vs Multi</u> | <u>Statistics for each study</u> |              |             |
|-------------------|-------------------|------------------------|----------------------------------|--------------|-------------|
|                   |                   |                        | Std diff in means                | Lower limit  | Upper limit |
| Mountney (FPI)    | 2016              | Multi                  | 0.26                             | -0.64        | 1.17        |
| Mountney (CCI)    | 2016              | Multi                  | 0.10                             | -0.83        | 1.03        |
| Mountney (PBBI)   | 2016              | Multi                  | 0.18                             | -0.59        | 0.95        |
| <b>Multi</b>      |                   |                        | <b>0.18</b>                      | <b>-0.31</b> | <b>0.68</b> |
| Lu                | 2007              | Single                 | 0.67                             | -0.23        | 1.57        |
| Wang              | 2007              | Single                 | -0.49                            | -1.16        | 0.18        |
| Wu                | 2008              | Single                 | 0.55                             | -0.45        | 1.55        |
| Abrahamson        | 2009              | Single                 | 1.19                             | -0.15        | 2.54        |
| Chauhan (i)       | 2010              | Single                 | -0.28                            | -1.27        | 0.70        |
| Chauhan (ii)      | 2011              | Single                 | -0.87                            | -1.89        | 0.16        |
| Indraswari        | 2012              | Single                 | -0.43                            | -1.24        | 0.38        |
| Vonder Haar (i)   | 2014              | Single                 | -0.43                            | -1.46        | 0.60        |
| Mountney          | 2016              | Single                 | -0.45                            | -1.44        | 0.54        |
| <b>Single</b>     |                   |                        | <b>-0.13</b>                     | <b>-0.53</b> | <b>0.27</b> |

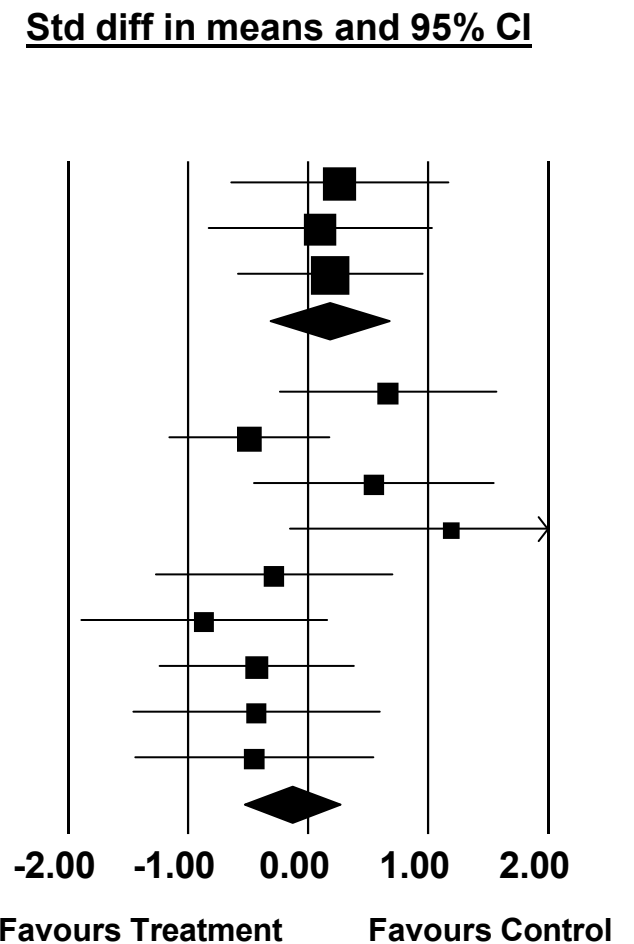

| <u>Study name</u>     | <u>Time point</u> | <u>Single vs Multi</u> | <u>Quality Score</u> | <u>Statistics for each study</u> |                        |                        | <u>Std diff in means and 95% CI</u> |
|-----------------------|-------------------|------------------------|----------------------|----------------------------------|------------------------|------------------------|-------------------------------------|
|                       |                   |                        |                      | <b>Std diff<br/>in means</b>     | <b>Lower<br/>limit</b> | <b>Upper<br/>limit</b> |                                     |
| Mountney (FPI)        | 2016              | Multi                  | ≥ 3                  | 0.26                             | -0.64                  | 1.17                   |                                     |
| Mountney (CCI)        | 2016              | Multi                  | ≥ 3                  | 0.10                             | -0.83                  | 1.03                   |                                     |
| Mountney (PBBI)       | 2016              | Multi                  | ≥ 3                  | 0.18                             | -0.59                  | 0.95                   |                                     |
| <b>Multi OVERALL</b>  |                   |                        |                      | <b>0.18</b>                      | <b>-0.31</b>           | <b>0.68</b>            |                                     |
| Lu                    | 2007              | Single                 | <3                   | 0.67                             | -0.23                  | 1.57                   |                                     |
| Wang                  | 2007              | Single                 | <3                   | -0.49                            | -1.16                  | 0.18                   |                                     |
| Wu                    | 2008              | Single                 | <3                   | 0.55                             | -0.45                  | 1.55                   |                                     |
| Abrahamson            | 2009              | Single                 | <3                   | 1.19                             | -0.15                  | 2.54                   |                                     |
| Chauhan (i)           | 2010              | Single                 | <3                   | -0.28                            | -1.27                  | 0.70                   |                                     |
| Chauhan (ii)          | 2011              | Single                 | <3                   | -0.87                            | -1.89                  | 0.16                   |                                     |
| Mountney              | 2016              | Single                 | <3                   | -0.45                            | -1.44                  | 0.54                   |                                     |
| <b>&lt;3</b>          |                   |                        |                      | <b>-0.02</b>                     | <b>-0.53</b>           | <b>0.49</b>            |                                     |
| Indraswari            | 2012              | Single                 | ≥ 3                  | -0.43                            | -1.24                  | 0.38                   |                                     |
| Vonder Haar (i)       | 2014              | Single                 | ≥ 3                  | -0.43                            | -1.46                  | 0.60                   |                                     |
| <b>≥ 3</b>            |                   |                        |                      | <b>-0.43</b>                     | <b>-1.06</b>           | <b>0.21</b>            |                                     |
| <b>Single OVERALL</b> |                   |                        |                      | <b>-0.13</b>                     | <b>-0.53</b>           | <b>0.27</b>            |                                     |

| <u>Study name</u> | <u>Time point</u> | <u>Single vs Multi</u> | <u>Statistics for each study</u> |                        |                        | <u>Std diff in means and 95% CI</u> |
|-------------------|-------------------|------------------------|----------------------------------|------------------------|------------------------|-------------------------------------|
|                   |                   |                        | <b>Std diff<br/>in means</b>     | <b>Lower<br/>limit</b> | <b>Upper<br/>limit</b> |                                     |
| Shear (FPI)       | 2016              | Multi                  | -0.36                            | -1.24                  | 0.52                   |                                     |
| Shear (CCI)       | 2016              | Multi                  | -0.73                            | -1.54                  | 0.08                   |                                     |
| Shear (PBBI)      | 2016              | Multi                  | -0.25                            | -0.97                  | 0.47                   |                                     |
| <b>Multi</b>      |                   |                        | <b>-0.43</b>                     | <b>-0.89</b>           | <b>0.03</b>            |                                     |
| Hoane (i)         | 2003              | Single                 | -1.24                            | -2.25                  | -0.23                  |                                     |
| Hoane (ii)        | 2006              | Single                 | 0.25                             | -0.41                  | 0.90                   |                                     |
| Hoane (iii)       | 2008              | Single                 | -1.64                            | -2.77                  | -0.50                  |                                     |
| Quigley           | 2009              | Single                 | -0.14                            | -1.12                  | 0.84                   |                                     |
| Goffus            | 2010              | Single                 | -0.99                            | -2.03                  | 0.05                   |                                     |
| Swan              | 2011              | Single                 | -0.30                            | -1.36                  | 0.77                   |                                     |
| Vondar Haar (ii)  | 2011              | Single                 | -1.31                            | -2.30                  | -0.32                  |                                     |
| Peterson (i)      | 2012              | Single                 | -0.98                            | -1.96                  | -0.00                  |                                     |
| Vondar Haar (iii) | 2014              | Single                 | 0.19                             | -0.71                  | 1.10                   |                                     |
| Peterson (ii)     | 2015              | Single                 | -1.01                            | -2.21                  | 0.19                   |                                     |
| <b>Single</b>     |                   |                        | <b>-0.65</b>                     | <b>-1.10</b>           | <b>-0.21</b>           |                                     |

-4.00   -2.00   0.00   2.00   4.00

Favours Treatment                      Favours Control

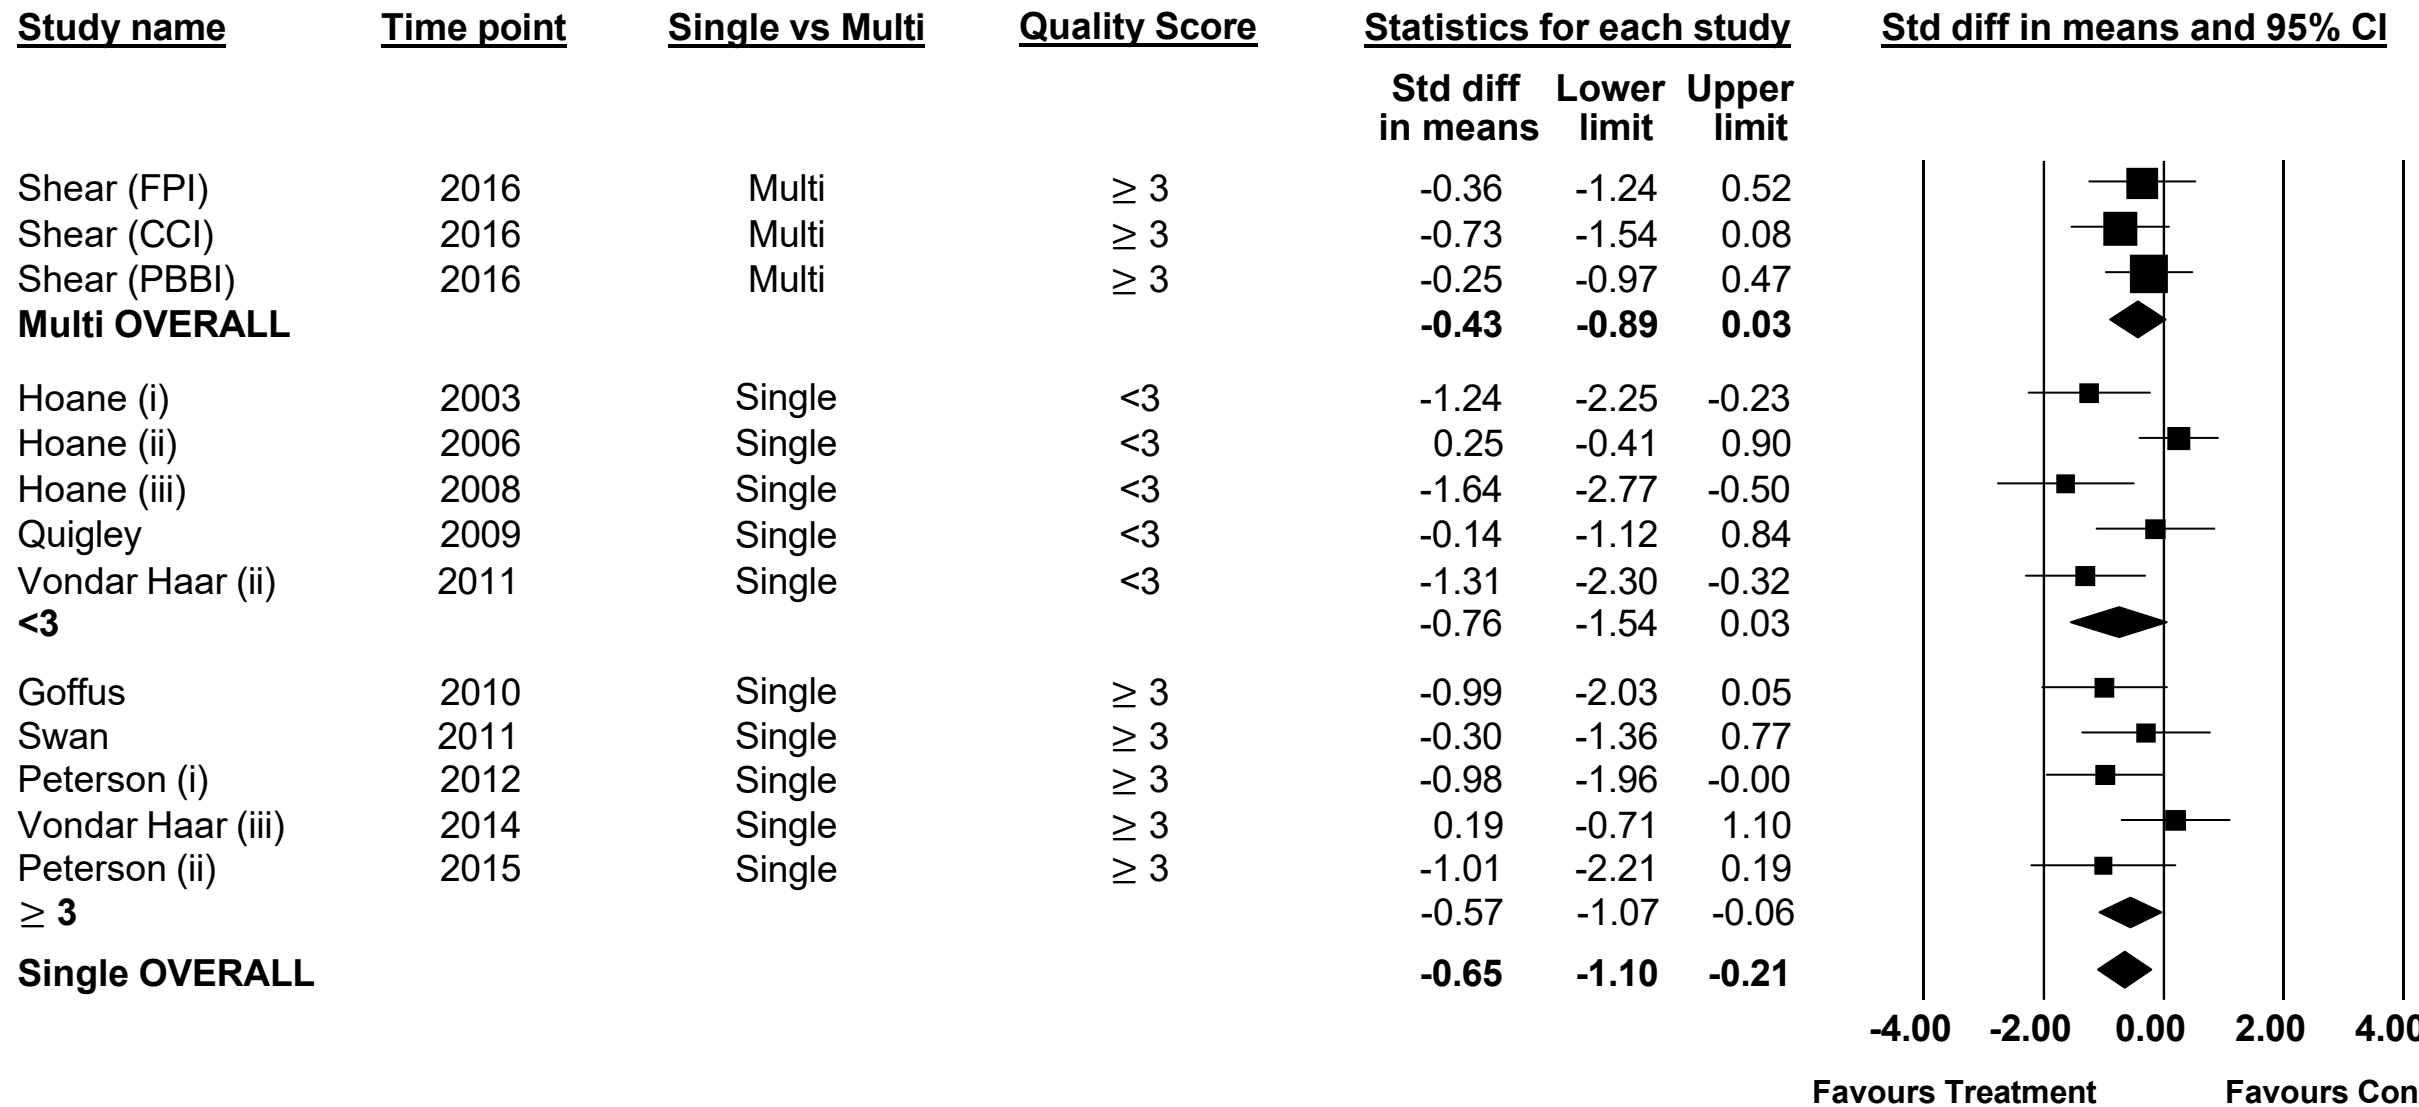



| <u>Study name</u>             | <u>Time point</u> | <u>Single vs Multi</u> | <u>Statistics for each study</u> |                |                |
|-------------------------------|-------------------|------------------------|----------------------------------|----------------|----------------|
|                               |                   |                        | Std diff<br>in means             | Lower<br>limit | Upper<br>limit |
| Arroyo-Araujo<br><b>Multi</b> | 2019              | Multi                  | -1.15                            | -1.65          | -0.65          |
| Silverman (i)                 | 2010              | Single                 | -1.73                            | -2.74          | -0.73          |
| Burket                        | 2011              | Single                 | 2.15                             | 1.05           | 3.25           |
| Mehta                         | 2011              | Single                 | -1.13                            | -1.99          | -0.26          |
| Silverman (ii)                | 2012              | Single                 | -1.24                            | -2.15          | -0.33          |
| Aguilar-Valles                | 2015              | Single                 | -2.03                            | -3.02          | -1.04          |
| Modi<br><b>Single</b>         | 2018              | Single                 | -0.96                            | -1.89          | -0.04          |
|                               |                   |                        | <b>-0.84</b>                     | <b>-1.92</b>   | <b>0.24</b>    |

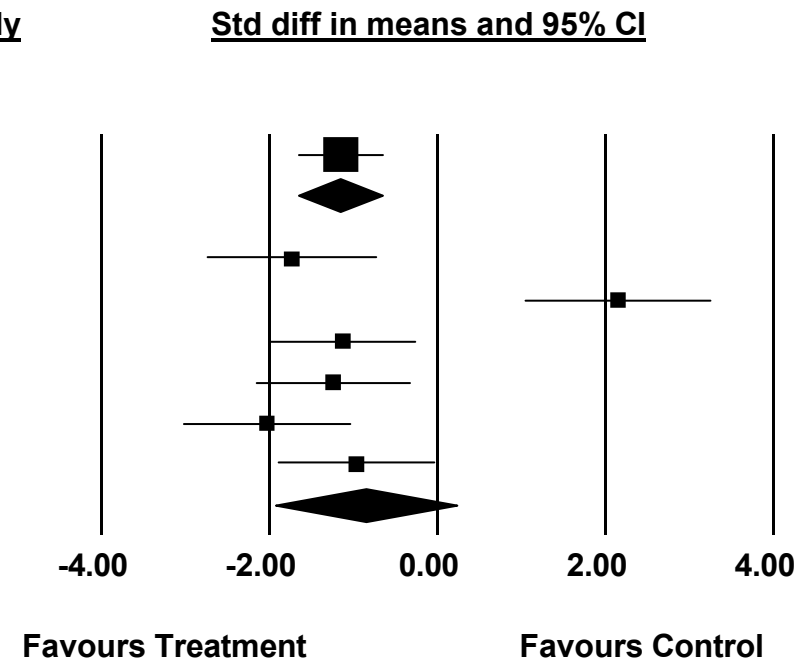

| <u>Study name</u>          | <u>Time point</u> | <u>Single vs Multi</u> | <u>Quality Score</u> | <u>Statistics for each study</u> |              |              |
|----------------------------|-------------------|------------------------|----------------------|----------------------------------|--------------|--------------|
|                            |                   |                        |                      | Std diff in means                | Lower limit  | Upper limit  |
| Arroyo-Araujo              | 2019              | Multi                  | $\geq 3$             | -1.15                            | -1.65        | -0.65        |
| <b>Multi OVERALL</b>       |                   |                        |                      | <b>-1.15</b>                     | <b>-1.65</b> | <b>-0.65</b> |
| Burket                     | 2011              | Single                 | <3                   | 2.15                             | 1.05         | 3.25         |
| Mehta                      | 2011              | Single                 | <3                   | -1.13                            | -1.99        | -0.26        |
| Silverman                  | 2012              | Single                 | <3                   | -1.24                            | -2.15        | -0.33        |
| Aguilar-Valles             | 2015              | Single                 | <3                   | -2.03                            | -3.02        | -1.04        |
| Modi                       | 2018              | Single                 | <3                   | -0.96                            | -1.89        | -0.04        |
| <b>&lt;3</b>               |                   |                        |                      | <b>-0.66</b>                     | <b>-1.92</b> | <b>0.60</b>  |
| Silverman                  | 2010              | Single                 | $\geq 3$             | -1.73                            | -2.74        | -0.73        |
| <b><math>\geq 3</math></b> |                   |                        |                      | <b>-1.73</b>                     | <b>-2.74</b> | <b>-0.73</b> |
| <b>Single OVERALL</b>      |                   |                        |                      | <b>-0.84</b>                     | <b>-1.92</b> | <b>0.24</b>  |

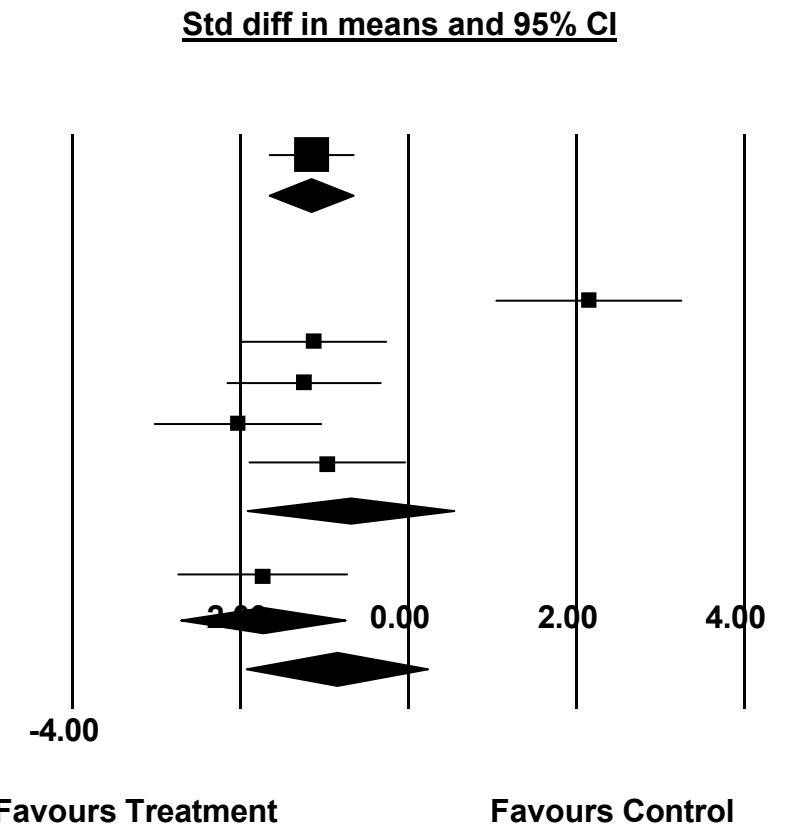

| <u>Study name</u> | <u>Time point</u> | <u>Single vs Multi</u> | <u>Statistics for each study</u> |                        |                        |
|-------------------|-------------------|------------------------|----------------------------------|------------------------|------------------------|
|                   |                   |                        | <b>Std diff<br/>in means</b>     | <b>Lower<br/>limit</b> | <b>Upper<br/>limit</b> |
| Jha (CCI)         | 2020              | Multi                  | -0.03                            | -0.75                  | 0.69                   |
| Jha (PBBI)        | 2020              | Multi                  | -1.02                            | -1.96                  | -0.09                  |
| Jha (FPI)         | 2020              | Multi                  | -0.06                            | -0.86                  | 0.74                   |
| <b>Multi</b>      |                   |                        | <b>-0.31</b>                     | <b>-0.91</b>           | <b>0.28</b>            |
| Simard            | 2009              | Single                 | -1.05                            | -1.98                  | -0.11                  |
| Zweckberger       | 2014              | Single                 | -2.81                            | -4.04                  | -1.57                  |
| Xu                | 2017              | Single                 | -1.35                            | -2.73                  | 0.02                   |
| Jha               | 2019              | Single                 | -0.11                            | -1.04                  | 0.81                   |
| Gerzanich         | 2019              | Single                 | -2.06                            | -3.21                  | -0.92                  |
| <b>Single</b>     |                   |                        | <b>-1.42</b>                     | <b>-2.35</b>           | <b>-0.50</b>           |

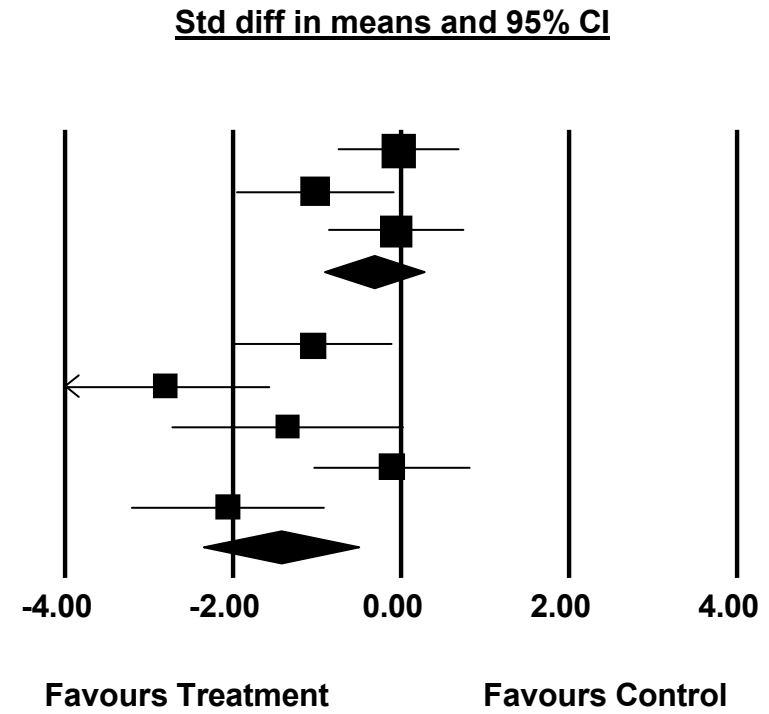

| <u>Study name</u>     | <u>Time point</u> | <u>Single vs Multi</u> | <u>Quality Score</u> | <u>Statistics for each study</u> |                        |                        |
|-----------------------|-------------------|------------------------|----------------------|----------------------------------|------------------------|------------------------|
|                       |                   |                        |                      | <b>Std diff<br/>in means</b>     | <b>Lower<br/>limit</b> | <b>Upper<br/>limit</b> |
| Jha (CCI)             | 2020              | Multi                  | ≥ 3                  | -0.03                            | -0.75                  | 0.69                   |
| Jha (PBBI)            | 2020              | Multi                  | ≥ 3                  | -1.02                            | -1.96                  | -0.09                  |
| Jha (FPI)             | 2020              | Multi                  | ≥ 3                  | -0.06                            | -0.86                  | 0.74                   |
| <b>Multi OVERALL</b>  |                   |                        |                      | <b>-0.31</b>                     | <b>-0.91</b>           | <b>0.28</b>            |
| Simard                | 2009              | Single                 | <3                   | -1.05                            | -1.98                  | -0.11                  |
| Xu                    | 2017              | Single                 | <3                   | -1.35                            | -2.73                  | 0.02                   |
| Gerzanich             | 2019              | Single                 | <3                   | -2.06                            | -3.21                  | -0.92                  |
| <b>&lt;3</b>          |                   |                        |                      | <b>-1.43</b>                     | <b>-2.07</b>           | <b>-0.79</b>           |
| Zweckberger           | 2014              | Single                 | ≥ 3                  | -2.81                            | -4.04                  | -1.57                  |
| Jha                   | 2019              | Single                 | ≥ 3                  | -0.11                            | -1.04                  | 0.81                   |
| <b>≥ 3</b>            |                   |                        |                      | <b>-1.43</b>                     | <b>-4.07</b>           | <b>1.21</b>            |
| <b>Single OVERALL</b> |                   |                        |                      | <b>-1.42</b>                     | <b>-2.35</b>           | <b>-0.50</b>           |

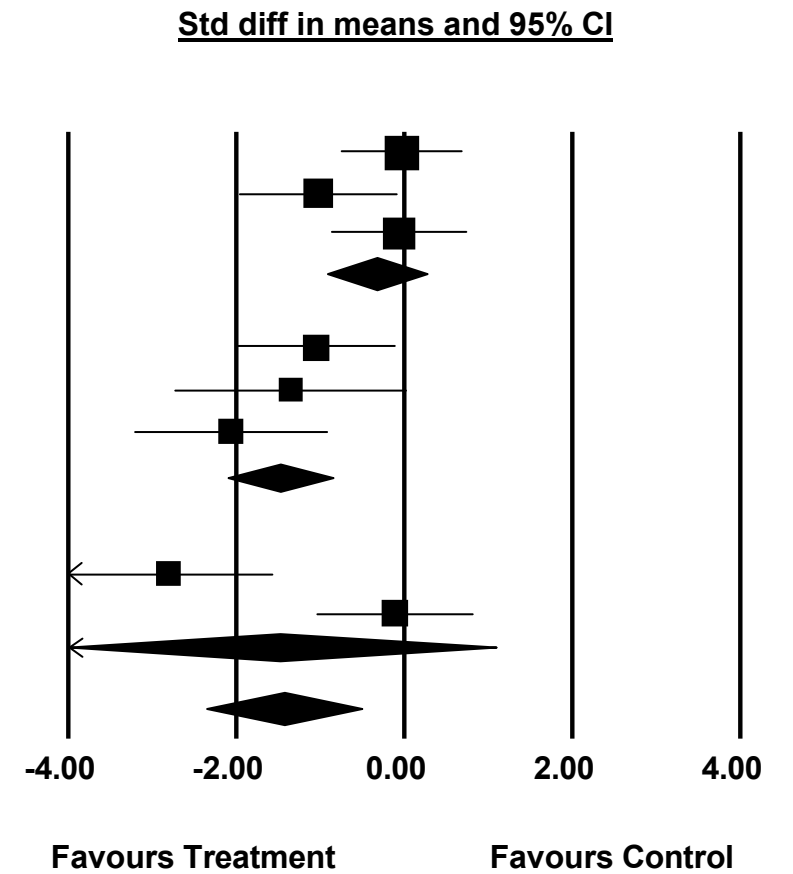

Supplement: fig2-data2 [file elife-76300-fig2-data2-v2.pdf]
