# Supplementary material for: A systematic assessment of preclinical multilaboratory studies and a comparison to single laboratory studies
Source: eLife. 2023 Mar 9;12:e76300. doi: 10.7554/eLife.76300 (PMC10168693; doi:10.7554/eLife.76300)
Supplement: Figure 2—source data 1. [file elife-76300-fig2-data1.xlsx]

## Sheet: Sheet1
Multicenter study	Effect size	Single center study	Effect size	Overall Single center effect size	Effect size ratio		Multicenter studies stats			Single center studies			Effect size ratio
Browning	-0.17	Zou, 2013	0.07	-0.63	370.588		Column1			Column1			Column1
		Zou, 2015	-1.14
		Caudle, 2016	-0.61				Mean	-0.185714		Mean	-0.950714		Mean	417.833
		Jin 2016	-0.99				Standard Error	0.250805		Standard Error	0.281449		Standard Error	123.677
Mountney	0.18	Lu 2007	0.67	-0.13	72.2222		Median	-0.15		Median	-0.8		Median	278.824
		Wang 2007	-0.49				Mode	#N/A		Mode	#N/A		Mode	#N/A
		Wu 2008	0.55				Standard Deviation	0.938425		Standard Deviation	1.05309		Standard Deviation	462.758
		Abrahamson 2009	1.19				Sample Variance	0.880642		Sample Variance	1.10899		Sample Variance	214145
		Chauhan 2010	-0.28				Kurtosis	2.61255		Kurtosis	3.15991		Kurtosis	4.14051
		Chauhan 2011	-0.87				Skewness	0.819345		Skewness	-0.472803		Skewness	1.9266
		Indraswari 2012	-0.43				Range	3.89		Range	4.81		Range	1657.14
		Vonder Haar 2014	-0.43				Minimum	-1.7		Minimum	-3.53		Minimum	57.1429
		Mountney 2016	-0.45				Maximum	2.19		Maximum	1.28		Maximum	1714.29
Shear	-0.43	Hoane 2003	-1.24	-0.65	151.163		Sum	-2.6		Sum	-13.31		Sum	5849.67
		Hoane 2006	0.25				Count	14		Count	14		Count	14
		Hoane 2008	-1.64					0			0			0
		Quigley 2009	-0.14
		Goffus 2010	-0.99
		Swan 2011	-0.3
		Vonder Haar 2011	-1.31				Mean
		Peterson 2012	-0.98				Multicenter effect size	-0.185714
		Vondar Haar 2014	0.19				Single center effect size	-0.950714
		Peterson 2015	-1.01
Dixon	-0.07	Scheff 1999	-2.9	-1.2	1714.29
		Sulivan 2000	-3.59				Effect size ratio of means	511.923
		Fukui 2003	-0.5
		Gabbita 2005	1.53
		Mbye 2009	-2.02
		Sulivan 2011	1.53
		Vlodavsky 2015	-3.12
		Karlsson 2019	-1.04
Gill	-0.13	Ablamunitis 2012	-0.72	-0.72	553.846
		Besancon 2018	-0.72
Llovera	-0.28	Becker 2001	-1.12	-0.98	350
		Relton 2001 a	-1.28
		Relton 2001 b	-0.63
		Liesz 2011 a	-2.35
		Liesz 2011 b	-0.36
		Liesz 2011 c	-0.63
		Langhauser 2014 a	-0.94
		Langhauser 2014 b	-0.09
		Neumann 2015	-3.04
		Drieu 2019 a	-0.54
		Drieu 2019 b	-0.19
Maysami	-1.45	Boutin 2001	-1.04	-1.69	116.552
		Touzani 2002	-1.6
		Mulcachy 2003 a	-5.16
		Mulcachy 2003 b	-3.82
		Tsai 2003	-2.68
		Le Feuvre 2003	-1.37
		Craft 2006	0.27
		Clark 2008	-1.56
		Pradillo 2012 a	-2.46
		Pradillo 2012 b	-1.61
		Denes 2014	-0.74
		Girard 2014	-0.64
Spoerke	0.56	Shuja 2008	-0.27	-0.32	57.1429
		Shuja 2011	-0.65
		Imam 2013	0.52
		Halaweish 2016	-1.31
		Georgoff 2017	-0.08
Alam	2.19	Alam 2011	6.75	1.28	58.4475
		Lee 2013	0.58
		Schechtman 2019	0.53
		Sheppard 2018	1
		Sheppard 2019	0.69
Reimer	-0.08	Jugdut 1980	-1.41	-0.76	950
		Romson 1980	-2.65
		Jugdut 1981	-1.15
		Darsee 1981	-1.7
		Romson 1982	-1.24
		Kirlin 1982	-0.43
		Brown 1983	0.92
		Flynn 1984	-1
		Jugdut 1985	-0.79
		Allan 1985	1.28
Bramlett	0.24	Peng 2014 SR	-1.72	-1.72	716.667
Jha	-0.31	Simard 2009	-1.05	-1.42	458.065
		Zweckberger 2014	-2.81
		Xu 2017	-1.35
		Jha 2019	-0.11
		Gerzanich 2019	-2.06
Arroyo-Araujo	-1.15	Silverman 2010	-1.73	-0.84	73.0435
		Burkey 2011	2.15
		Mehta 2011	-1.13
		Silverman 2012	-1.24
		Aguilar-Vales 2015	-2.03
		Modi 2018	-0.96
Jones	-1.7	Gao 2000	-2.28	-3.53	207.647
		Hatori 2001	-2.51
		Lange 2006	-3.8
		Boengler 2007	-2.42
		Pagel 2007	-6.92
		Lie 2010	-3.59
		Roesner 2010	-1.74
		Smul 2011	-4.26
		Eckle 2012	-12.65
		YangZ 2013	-3.36

## Sheet: Multi
Study	Was there randomization?	Randomization methods	Blinding of personnel?	Blinding of outcome assessment?	Incomplete outcome data?	Total score			Mean
Reimer, 1985	1	0	0	1	0	2			Column1					Was there randomization?	93.75
Crabbe, 1999	1	0	0	0	1	2								Randomization methods	18.75
Alam, 2009	1	0	0	0	1	2			Mean	2.9375				Blinding of personnel?	68.75
Spoerke, 2009	1	0	0	0	1	2			Standard Error	0.265656				Blinding of outcome assessment?	75
Jones, 2015	1	1	1	1	1	5			Median	3				Incomplete outcome data?	37.5
Llovera, 2015	1	1	1	1	1	5			Mode	3
Maysami, 2015	1	0	1	1	0	3			Standard Deviation	1.06262				Multicenter							% of 16	% of 95
Bramlett, 2016	1	0	1	1	0	3			Sample Variance	1.12917				Number of studies	% out of 16					Total score	Multicenter studies	Single center studies
Browning, 2016	1	0	1	1	0	3			Kurtosis	0.561545			0	0	0					Below 3	31	78
Dixon, 2016	1	0	1	1	0	3			Skewness	0.519398			1	1	6.25					3 and above	69	22
Gill, 2016	0	0	0	1	0	1			Range	4			2	4	25					0	0	10.989
Mountney, 2016	1	0	1	1	0	3			Minimum	1			3	8	50					1	6.25	24.1758
Shear, 2016	1	0	1	1	0	3			Maximum	5			4	1	6.25					2	25	42.8571
Arroyo-Araujo, 2019	1	1	1	0	1	4			Sum	47			5	2	12.5					3	50	18.6813
Jha, 2020	1	0	1	1	0	3			Count	16			Below 3	5	31.25					4	6.25	3.2967
Kleiver, 2020	1	0	1	1	0	3				0			3 and above	11	68.75					5	12.5	0
	15	3	11	12	6
	93.75	18.75	68.75	75	37.5

## Sheet: Single
	All single center studies
Multi	Study	Was there randomization?	Randomization methods?	Blinding of personnel?	Blinding of outcome assessment?	Incomplete outcome data?	Total score	Total score sorted
Reimer	Jugdut, 1980	1	0	0	0	0	1	1			Column1
	Romson, 1980	0	0	0	0	1	1	1
	Darsee, 1981	1	1	0	0	0	2	2			Mean	1.78571
	Jugdut, 1981	1	0	0	0	1	2	2			Standard Error	0.103109
	Kirlin, 1982	1	0	0	0	0	1	1			Median	2
	Romson, 1982	0	0	0	0	1	1	1			Mode	2
	Brown, 1983	1	0	0	0	0	1	1			Standard Deviation	0.983596
	Flynn, 1984	0	0	0	0	1	1	1			Sample Variance	0.96746
	Allan, 1985	1	0	0	0	0	1	1			Kurtosis	-0.320661
	Jugdut, 1985	1	0	0	0	1	2	2			Skewness	-0.0508006
Alam	Alam, 2011	1	0	0	0	0	1	1			Range	4
	Lee, 2013	1	0	0	0	0	1	1			Minimum	0
	Sheppard, 2018	1	0	0	0	0	1	1			Maximum	4
	Schechtman, 2019	1	0	0	0	1	2	2			Sum	162.5
	Sheppard, 2019	1	0	0	0	0	1	1			Count	91
Spoerke	Shuja, 2008	1	0	0	0	1	2	2				0
	Shuja, 2011	0	0	0	0	0	0	0
	Imam, 2013	1	0	0	0	1	2	2
	Halaweish, 2016	1	0	0	1	0	2	2
	Georgoff 2017	1	0	0	1	0	2	2
Jones	Gao, 2000	0	0	0	1	0	1	1
	Hatori, 2001	1	1	0	0	1	3	3
	Lange, 2006	1	0	0	0	1	2	2
	Boengler, 2007	0	0	0	0	0	0	0
	Pagel, 2007	1	0	0	0	1	2	2
	Lie, 2010	1	0	0	1	0	2	2
	Roesner, 2010	0	0	0	1	1	2	2
	Smul, 2011	1	0	0	1	1	3	3
	Eckle, 2012	0	0	0	0	0	0	0
	YangZ, 2013	0	0	0	0	0	0	0
Llovera	Becker, 2001	0	0	0	1	1	2	2
	Relton, 2001	0	0	0	0	0	0	0
	Liesz, 2011	0	0	0	1	0	1	1
	Langhauser, 2014	0	0	1	1	1	3	3
	Neumann, 2015	0	0	1	1	0	2	2
	Drieu, 2019	0	0	1	0	1	2	2
Bramlett	Peng, 2014	0.6	0	0	0.6	0.3	1.5	1.5
Maysami	Boutin, 2001	1	0	0	1	0	2	2
	Touzani, 2002	1	0	0	1	0	2	2
	Mulcachy, 2003	0	0	0	1	0	1	1
	Tsai, 2003	0	0	0	0	1	1	1
	Le Feuvre, 2003	0	0	0	0	0	0	0
	Craft, 2006	0	0	0	0	0	0	0
	Clark, 2008	0	0	0	0	1	1	1
	Padillo, 2012	1	0	1	1	0	3	3
	Denes, 2014	1	1	0	1	0	3	3
	Girard, 2014	1	0	1	1	1	4	4
Browning	Zou, 2013	1	0	1	1	0	3	3
	Zou, 2015	1	0	1	1	0	3	3
	Caudle, 2016	0	0	1	1	0	2	2
	Jin, 2016	1	0	0	0	0	1	1
	Scheff, 1999	0	0	0	1	1	2	2
	Sullivan, 2000	1	0	0	1	0	2	2
	Fukui, 2003	1	0	0	0	0	1	1
	Gabbita, 2005	0	0	0	1	1	2	2
	Mbye, 2009	0	0	0	1	1	2	2
	Sullivan, 2011	1	0	0	1	0	2	2
	Vlodavsky, 2015	1	0	0	1	1	3	3
	Karlsson, 2019	1	1	1	1	0	4	4
Gill	Ablamunitis, 2012	1	0	0	0	0	1	1
	Besançon, 2018	1	0	0	1	0	2	2
Mountney	Lu, 2007	1	0	0	1	0	2	2
	Wang, 2007	1	0	0	1	1	3	3
	Wu, 2008	1	0	0	1	0	2	2
	Abrahamson, 2009	1	0	0	0	0	1	1
	Chauhan, 2010	0	0	0	0	0	0	0
	Chauhan, 2011	0	0	0	0	0	0	0
	Indraswari, 2012	1	1	0	1	0	3	3
	Vonder Haar, 2014 (Mountney)	1	0	1	1	0	3	3
	Mountney, 2016	1	0	0	1	0	2	2
Shear	Hoane, 2003	0	0	1	1	0	2	2
	Hoane, 2006	0	0	0	1	1	2	2
	Hoane, 2008	0	0	1	1	0	2	2
	Quigley, 2009	0	0	1	1	0	2	2
	Goffus, 2010	0	0	1	1	1	3	3
	Swan, 2011	1	0	1	1	0	3	3
	Vondar Haar, 2011	1	0	0	1	0	2	2
	Peterson, 2012	1	0	1	1	0	3	3
	Vondar Haar, 2014 (Shear)	1	0	0	0	1	2	2
	Peterson, 2015	1	0	1	0	1	3	3
Jha	Simard, 2009	0	0	1	1	0	2	2
	Zweckberger, 2014	1	0	1	0	1	3	3
	Xu, 2017	0	0	0	0	1	1	1
	Jha, 2018	1	1	1	1	0	4	4
	Gerzanich, 2019	0	0	0	1	1	2	2
Arroyo	Silverman, 2010	0	0	1	1	1	3	3
	Burket, 2011	0	0	0	0	0	0	0
	Mehta, 2011	0	0	0	1	1	2	2
	Silverman, 2012	0	0	1	1	0	2	2
	Aguilar-Valles, 2015	0	0	0	1	1	2	2
	Modi, 2018	1	0	0	0	0	1	1
		51.6	6	22	48.6	34.3
		56.7033	6.59341	24.1758	53.4066	37.6923

## Sheet: Reimer
Reimer	Study	Was there randomization?	Randomization methods?	Blinding of personnel?	Blinding of outcome assessment?	Incomplete outcome data?	Total score
	Jugdut, 1980	1	0	0	0	0	1
	Romson, 1980	0	0	0	0	1	1
	Darsee, 1981	1	1	0	0	0	2
	Jugdut, 1981	1	0	0	0	1	2
	Kirlin, 1982	1	0	0	0	0	1
	Romson, 1982	0	0	0	0	1	1
	Brown, 1983	1	0	0	0	0	1
	Flynn, 1984	0	0	0	0	1	1
	Allan, 1985	1	0	0	0	0	1
	Jugdut, 1985	1	0	0	0	1	2

## Sheet: Alam
Alam
	Study	Was there randomization?	Randomization methods?	Blinding of personnel?	Blinding of outcome assessment?	Incomplete outcome data?	Total score
	Alam, 2011	1	0	0	0	0	1
	Lee, 2013	1	0	0	0	0	1
	Sheppard, 2018	1	0	0	0	0	1
	Schechtman, 2019	1	0	0	0	1	2
	Sheppard, 2019	1	0	0	0	0	1

## Sheet: Spoerke
	Study	Was there randomization?	Randomization methods?	Blinding of personnel?	Blinding of outcome assessment?	Incomplete outcome data?	Total score
	Shuja, 2008	1	0	0	0	1	2
	Spoerke, 2010	1	0	0	0	0	1
	Shuja, 2011	0	0	0	0	0	0
	Imam, 2013	1	0	0	0	1	2
	McCully, 2015	1	0	1	0	1	3
	Halaweish, 2016	1	0	0	1	0	2
	Georgoff 2017	1	0	0	1	0	2
	Pati, 2018	0	0	0	1	0	1

## Sheet: Jones
Study	Was there randomization?	Randomization methods	Blinding of personnel?	Blinding of outcome assessment?	Incomplete outcome data?	Total score
Gao, 2000	0	0	0	1	0	1
Hatori, 2001	1	1	0	0	1	3
Lange, 2006	1	0	0	0	1	2
Boengler, 2007	0	0	0	0	0	0
Pagel, 2007	1	0	0	0	1	2
Lie, 2010	1	0	0	1	0	2
Roesner, 2010	0	0	0	1	1	2
Smul, 2011	1	0	0	1	1	3
Eckle, 2012	0	0	0	0	0	0
YangZ, 2013	0	0	0	0	0	0

## Sheet: Llovera
	Study	Was there randomization?	Randomization methods?	Blinding of personnel?	Blinding of outcome assessment?	Incomplete outcome data?	Total score
	Becker, 2001	0	0	0	1	1	2
	Relton, 2001	0	0	0	0	0	0
	Liesz, 2011	0	0	0	1	0	1
	Langhauser, 2014	0	0	1	1	1	3
	Neumann, 2015	0	0	1	1	0	2
	Drieu, 2019	0	0	1	0	1	2

## Sheet: Bramlett
Study	Was there randomization?	Randomization methods	Blinding of personnel?	Blinding of outcome assessment?	Incomplete outcome data?	Total score
Peng, 2014	0.64	0	0	0.64	0.27	1.55

## Sheet: Maysami
	Study	Was there randomization?	Randomization methods?	Blinding of personnel?	Blinding of outcome assessment?	Incomplete outcome data?	Total score
	Boutin, 2001	1	0	0	1	0	2
	Touzani, 2002	1	0	0	1	0	2
	Mulcachy, 2003	0	0	0	1	0	1
	Tsai, 2003	0	0	0	0	1	1
	Le Feuvre, 2003	0	0	0	0	0	0
	Craft, 2006	0	0	0	0	0	0
	Clark, 2008	0	0	0	0	1	1
	Padillo, 2012	1	0	1	1	0	3
	Denes, 2014	1	1	0	1	0	3
	Girard, 2014	1	0	1	1	1	4

[truncated: 7 more sheets: Browning, Dixon, Gill, Mountney, Shear, Jha, Arroyo]
